# 1 **A validation scale to determine the readiness of** 2 **environmental DNA assays for routine species monitoring**

3  
4 **Bettina Thalinger<sup>1,2\*</sup>, Kristy Deiner<sup>3,4</sup>, Lynsey R. Harper<sup>5,6</sup>, Helen C. Rees<sup>7</sup>, Rosetta C.**  
5 **Blackman<sup>8,9</sup>, Daniela Sint<sup>2,10</sup>, Michael Traugott<sup>2,10</sup>, Caren S. Goldberg<sup>11</sup> & Kat Bruce<sup>12</sup>**

6  
7 <sup>1</sup> Centre for Biodiversity Genomics, University of Guelph, 50 Stone Road E, N1G 2W1, Guelph,  
8 Ontario, Canada

9 <sup>2</sup> Department of Zoology, University of Innsbruck, Technikerstr. 25, 6020, Innsbruck, Austria

10 <sup>3</sup> Natural History Museum, Cromwell Road, London, SW7 5BD, UK

11 <sup>4</sup> Institute of Biogeochemistry and Pollutant Dynamics, ETH Zurich, Universitätstr. 16, 8092  
12 Zurich, Switzerland

13 <sup>5</sup> Illinois Natural History Survey, Prairie Research Institute, University of Illinois at Urbana-  
14 Champaign, Champaign, IL, USA

15 <sup>6</sup> School of Natural Sciences and Psychology, Liverpool John Moores University, Liverpool,  
16 L3 3AF, UK

17 <sup>7</sup> RSK ADAS Ltd, School of Veterinary Medicine and Science, The University of Nottingham,  
18 Sutton Bonington Campus, Loughborough, LE12 5RD, UK

19 <sup>8</sup> Eawag: Swiss Federal Institute of Aquatic Science and Technology, Department of Aquatic  
20 Ecology, Überlandstr. 133, 8600 Dübendorf, Switzerland

21 <sup>9</sup> Department of Evolutionary Biology and Environmental Studies, University of Zurich,  
22 Winterthurerstr. 190, CH-8057 Zurich, Switzerland

23 <sup>10</sup> Sinsoma GmbH, Lannes 6, 6176 Völs, Austria

24 <sup>11</sup> School of the Environment, Washington State University, Pullman, WA 99164, USA

25 <sup>12</sup> Nature Metrics Ltd, CABI Site, Bakeham Lane, Egham, TW20 9TY, UK

26

27 **\*Corresponding author:**

28 Bettina Thalinger, [bettina.thalinger@gmail.com](mailto:bettina.thalinger@gmail.com)

29 Centre for Biodiversity Genomics, University of Guelph, 50 Stone Road E, N1G 2W1, Guelph,

30 Ontario, Canada

31

32 Running headline: eDNA assay validation scale

33

34 **Abstract**

35

36 The use of environmental DNA (eDNA) analysis for species monitoring requires rigorous validation -  
37 from field sampling to interpretation of PCR-based results - for meaningful application and  
38 interpretation. Assays targeting eDNA released by individual species are typically validated with no  
39 predefined criteria to answer specific research questions in one ecosystem. Their general  
40 applicability, uncertainties and limitations often remain undetermined. The absence of clear  
41 guidelines prevents targeted eDNA assays from being incorporated into species monitoring and  
42 policy, thus their establishment will be key for the future implementation of eDNA-based surveys. We  
43 describe the measures and tests necessary for successful validation of targeted eDNA assays and  
44 the associated pitfalls to form the basis of guidelines. A list of 122 variables was compiled,  
45 consolidated into 14 thematic blocks, such as “*in silico* analysis”, and arranged on a 5-level  
46 validation scale from “incomplete” to “operational”. Additionally, minimum validation criteria were  
47 defined for each level. These variables were evaluated for 546 published single-species assays. The  
48 resulting dataset was used to provide an overview of current validation practices and test the  
49 applicability of the validation scale for future assay rating. The majority (30%) of investigated assays  
50 were classified as Level 1 (incomplete), and 15% did not achieve this first level. These assays were  
51 characterised by minimal *in silico* and *in vitro* testing, but their share in annually published eDNA  
52 assays has declined since 2014. The total number of reported variables ranged from 20% to 76%  
53 and deviated both between and within levels. The meta-analysis demonstrates the suitability of the  
54 5-level validation scale for assessing targeted eDNA assays. It is a user-friendly tool to evaluate  
55 previously published assays for future research and routine monitoring, while also enabling  
56 appropriate interpretation of results. Finally, it provides guidance on validation and reporting  
57 standards for newly developed assays.

58

59 **Key words:** digital PCR, eDNA, endpoint PCR, <https://edna-validation.com/>, quantitative PCR,  
60 species-specific, species detection

## 61 1. Introduction

62  
63 Determining the occurrence of species is essential for ecology and requires sensitive and  
64 accurate detection methods. Within the last decade, species detection from environmental DNA  
65 (eDNA; i.e. detection of trace DNA released by organisms into their environment) has shown  
66 great potential for routine species surveys (Rees, Maddison, Middleditch, Patmore, & Gough,  
67 2014; Goldberg et al., 2016; Deiner et al., 2017). The interest in molecular species detection  
68 has fuelled the development of over 500 assays, reviewed herein, that utilise PCR of DNA or  
69 RNA extracted from environmental samples. Generally, “targeted” eDNA assays must be  
70 specific to the species of interest and possess high sensitivity to allow detection at low densities,  
71 low DNA concentrations, and across spatiotemporal scales (Goldberg et al., 2016; MacDonald  
72 & Sarre, 2017).

73 A targeted eDNA assay encompasses the entire workflow used to detect a species’ DNA  
74 from an environmental sample, inclusive of field sampling to the interpretation of PCR-based  
75 results, and not just the primers and probes. Thus, adherence to workflows will determine the  
76 success or failure of an eDNA assay because methodological choices influence performance  
77 and sensitivity (e.g. Doi, Takahara, et al., 2015). An assay is often validated within a specific  
78 system to answer a set question about the target species. Its applications beyond initial  
79 development are hampered by the poor understanding of remaining uncertainties, such as the  
80 potential for false positives resulting from non-target amplification or contamination, or false  
81 negatives resulting from low sensitivity, sample degradation, low DNA yield protocols or  
82 inhibition (Goldberg et al., 2016; Lacoursière-Roussel & Deiner, 2019). In a management  
83 context, false positives and false negatives may lead to misuse of resources (e.g. funds and  
84 personnel) for issues such as rare species protection and invasive species control. Both  
85 scenarios foster inaccurate interpretation of results, fuelling arguments against routine use of  
86 eDNA detection for species monitoring (Jerde, 2019).



87        Aside from a few well-validated eDNA assays that have been developed and incorporated  
88 into routine monitoring, the application of published assays is a minefield for end-users to  
89 navigate. We illustrate this through two examples. The assay for great crested newt  
90 (*Triturus cristatus* (Laurenti, 1768), a legally protected species in the UK [Natural England,  
91 2015]) was one of the first eDNA assays validated in both laboratory and field trials against  
92 conventional tools, demonstrating its potential for routine monitoring (Thomsen et al., 2012;  
93 Rees, Bishop, et al., 2014). After successful validation, a national eDNA-based citizen science  
94 monitoring scheme was tested and showed that large-scale eDNA sampling can enable  
95 distribution modelling (Biggs et al., 2015). These initial studies paved the way for eDNA-based  
96 *T. cristatus* detection to inform new policies aimed at providing landscape-level species  
97 protection (L. R. Harper, Buxton, et al., 2019). Studies have since investigated optimal methods  
98 of eDNA capture, relative abundance and detection probability estimation, and the influence of  
99 seasonality as well as biotic and abiotic factors on *T. cristatus* eDNA detection and  
100 quantification (Buxton, Groombridge, & Griffiths, 2017; Buxton, Groombridge, Zakaria, &  
101 Griffiths, 2017; Buxton, Groombridge, & Griffiths, 2018a, 2018b). Due to these combined efforts,  
102 the assay has undergone exemplary validation and is operational for management.

103        Conversely, no assays have been successfully applied to routine monitoring of invasive  
104 American crayfish. For example, there is a lack of consensus on a single assay for the signal  
105 crayfish (*Pacifastacus leniusculus* (Dana, 1852)). Larson et al. (2017) developed and tested an  
106 assay against conventional trapping, but five other assays have also been proposed with  
107 differing degrees of validation and divergent *in silico* and *in vitro* approaches (Agersnap et al.,  
108 2017; Dunn, Priestley, Herraiz, Arnold, & Savolainen, 2017; K. J. Harper, Anucha, Turnbull,  
109 Bean, & Leaver, 2018; Mauvisseau et al., 2018; Robinson, Uren Webster, Cable, James, &  
110 Consuegra, 2018). The *P. leniusculus* assays were developed using a variety of strategies for  
111 eDNA sampling, capture, extraction, qPCR of different genetic markers, and applied across  
112 genetically diverse populations within the species range. Due to this substantial methodological

113 variability, direct comparisons between results obtained from these assays are impossible.  
114 Therefore, the *P. leniusculus* assays represent a minefield for end-users, despite the need for  
115 accurate and sensitive tools to enable actionable species management of this invasive species  
116 in Europe.

117 These case studies exemplify how consensus and dissent in assay validation can influence  
118 the implementation of eDNA analysis for species monitoring. Developing guidelines to  
119 determine the suitability of eDNA assays for end-users will therefore ensure that ecological  
120 insights or management decisions are based on robust molecular analyses with quantifiable  
121 uncertainties and clear inference limits (Goldberg et al., 2016; MacDonald & Sarre, 2017;  
122 Nicholson et al., 2020). Here, we describe the general validation process for targeted PCR-  
123 based methods and examine the extent of assay validation and reporting in the eDNA literature.  
124 We present an eDNA assay validation scale, which establishes criteria to enable the  
125 classification of assays based on their accuracy and sensitivity for single-species detection. To  
126 demonstrate the utility of the scale, we performed a meta-analysis of targeted eDNA assays  
127 published in 327 papers as of 11<sup>th</sup> April 2019 (546 assays). By placing an eDNA assay on the  
128 validation scale, end-users can determine the recommended scenarios for application and  
129 improve assay performance with further validation.

130

131

## 132 **2. Criteria and principles of validation**

133

### 134 *2.1. General requirements for an eDNA laboratory*

135

136 All laboratory activities are subject to error. In order to have confidence in results, quality  
137 standards and good practices are required in diagnostic laboratory environments (e.g. World  
138 Health Organization, 2011; Halling, Schrijver, & Persons, 2012). Although few eDNA-processing

139 laboratories will employ ‘ancient DNA’ practices (e.g. hazmat suit and positive air pressure with  
140 HEPA filtered inflow), all laboratories conducting eDNA analysis should utilise a unidirectional  
141 workflow where pre-PCR steps are performed in separate laboratories dedicated to low DNA  
142 quality and quantity (Goldberg et al., 2016). Completely standardised laboratory environments  
143 are rare and the use of proficiency tests (as conducted by UK laboratories participating in  
144 *T. cristatus* monitoring) can help end-users understand the quality of results obtained among  
145 different laboratories. Even results obtained from an extensively validated assay can be  
146 questionable when they are not produced within a suitable laboratory environment (Goldberg et  
147 al., 2016).

148

## 149 2.2. Reporting standards for *in silico*, *in vitro* and *in situ* validation of assays

150

151 Targeted eDNA assay validation is a multi-step process. It can be divided into *in silico* validation  
152 (i.e. computer-based tests for primer specificity), *in vitro* validation (i.e. laboratory tests with  
153 reference tissue samples) and *in situ* validation (i.e. field tests with eDNA samples) (see  
154 Goldberg et al., 2016; MacDonald & Sarre, 2017). Understanding the utility of an assay requires  
155 both knowledge of the context in which it has been designed, and a broader understanding of  
156 how it was developed. Here, we give a brief overview of what key steps comprise assay  
157 validation, with a focus on troubleshooting steps that may be necessary when applying  
158 previously published assays to new locations or with modified laboratory practices (Table 1).

159 The first step is *in silico* assay validation, the goal of which is to determine assay  
160 specificity based on known sequence diversity. Sequence diversity has three categories,  
161 including sequences from: (i) closely related and co-occurring species, (ii) closely related but  
162 geographically distinct species, and (iii) distantly related but co-occurring species (i.e.  
163 sequences that could co-amplify and produce false positive results for a target species). By  
164 checking primer specificity from available sequences, the geographic area of applicability for an

165 assay can be maximised through identifying and removing potential issues of co-amplification.  
166 Typically public or custom databases are used for performing *in silico* amplification (e.g.  
167 ecoPCR [Boyer et al., 2016]; primerBlast [Ye et al., 2012]; PrimerTREE [Cannon et al., 2016];  
168 PrimerMiner [Elbrecht & Leese, 2017]). While reference sequence libraries are often far from  
169 complete and many of the factors influencing successful PCR amplification cannot be simulated,  
170 *in silico* testing provides a first impression of primer performance and should be conducted.

171 The essential components of *in vitro* assay validation are optimisation, specificity, and  
172 sensitivity. Tests with varying PCR chemistry, reaction volume, primer/probe concentration,  
173 cycling conditions and technical replication will ensure optimal, standardised and error-free  
174 target DNA amplification (Bustin et al., 2009; Wilcox, Carim, McKelvey, Young, & Schwartz,  
175 2015; Goldberg et al., 2016). The assay must then be tested against closely related and co-  
176 occurring non-target taxa to ensure specificity (Goldberg et al., 2016). Ideally, tissue-derived  
177 DNA samples from multiple individuals spanning a defined geographic area are tested to ensure  
178 the assay is robust to genetic variants of target and non-target species. Amplicons should be  
179 Sanger sequenced to confirm species identity (Goldberg et al., 2016), but short fragments  
180 (<100 bp) have limited sequence length available for species determination (Meusnier et al.,  
181 2008). Next, the Limit of Detection (LOD) must be determined to assess assay sensitivity, and  
182 the Limit of Quantification (LOQ) determined, if the measurement of eDNA quantity is desired.  
183 Generally, these values are obtained using a dilution series of quantified DNA amplicons or  
184 synthesized gene fragments (e.g. gBlock, IDT) based on public or *de novo* reference  
185 sequences. The LOD and LOQ have various definitions in the eDNA literature, but were recently  
186 standardised by Klymus et al. (2019), where LOD is the lowest standard concentration at which  
187 95% of technical replicates amplify and LOQ is the lowest standard concentration for which the  
188 coefficient of variation (CV) value is <35%. Unfortunately, the existence of past definitions  
189 requires the final LOD and LOQ to be reported as well as the definition used. We note that  
190 these metrics apply directly to the assay as developed and assume no interference during PCR

191 from the rest of the species' genome (i.e. if a gBlock is used), other genetic material, or  
192 inhibitory compounds.

193 Finally, the assay must be validated *in situ* by surveying sites with and without the target  
194 species (Goldberg et al., 2016). It must be tested against conventional tools for  
195 presence/absence detection and tests for estimation of relative abundance/biomass are  
196 advisable. Assays are deemed successful if eDNA and conventional detections concur at  
197 occupied sites and no eDNA detections are observed at definitively unoccupied sites. Sanger  
198 sequencing of eDNA amplicons can provide additional evidence but cannot distinguish sample  
199 contamination from true detections (Goldberg et al., 2016). Besides screening for the target  
200 species, negative eDNA samples (or all eDNA samples if quantification is necessary) should be  
201 tested for inhibition. This requires an Internal Positive Control (IPC) assay for synthetic DNA  
202 (e.g. ThermoFisher) or an assay for non-target species using exogenous or endogenous DNA  
203 (Goldberg et al., 2016; Doi et al., 2017; Furlan & Gleeson, 2017).

204 Advanced *in situ* validation may investigate the influence of biotic (e.g. abundance, biomass,  
205 life stages, microbial activity) and abiotic (e.g. temperature, pH, ultraviolet light, salinity) factors  
206 influencing eDNA origin, state, fate, and transport (Barnes & Turner, 2016; Lacoursière-Roussel  
207 & Deiner, 2019). Assays that account for spatial (e.g. shoreline versus offshore) and temporal  
208 (e.g. summer versus winter) variation in eDNA distribution and abundance due to the ecology of  
209 a species can be implemented with greater confidence (de Souza, Godwin, Renshaw, & Larson,  
210 2016; Lawson Handley et al., 2019). Occupancy modelling using eDNA data is desirable as it  
211 accounts for detection probability while estimating site occupancy, even if all field samples from  
212 a site return negative. Hierarchical models that incorporate eDNA occupancy and detection  
213 probabilities at site, sample, and technical replicate levels are most accurate and can be  
214 implemented in software such as R (e.g. package "eDNAoccupancy" [Dorazio & Erickson,  
215 2018]) or PRESENCE (MacKenzie et al., 2002). However, model assumptions regarding false  
216 positives should be carefully considered.

217

218

### 219 **3. Types and trade-offs of targeted eDNA detection methods**

220

221 Amid the processing chain (i.e. sampling to data analysis) for a targeted eDNA assay, PCR  
222 warrants extra consideration as the technological spectrum and potential for variation is  
223 enormous. Previous publications have typically defined an assay as the primers (and probe)  
224 required for DNA amplification and associated visualisation (e.g. agarose gel electrophoresis,  
225 qPCR software). Hence, differences between the multiple detection instruments and chemistry  
226 used in combination with species-specific primer (and probe) sets are at the core of targeted  
227 eDNA assays. Table 2 provides an overview of amplification types and their associated trade-  
228 offs.

229 Many assays - especially those published in earlier years - use endpoint PCR. However,  
230 most assays to date employ real-time quantitative (q)PCR allowing for greater sensitivity and  
231 quantitative data. More recent publications have used digital (d)PCR for absolute quantification.  
232 Alternatively, LAMP and CRISPR were shown to be suitable for eDNA applications, decreasing  
233 the requirements of in-field testing equipment (M. R. Williams et al., 2017; M. A. Williams et al.,  
234 2019). A few publications use alternative methods such as PCR combined with restriction  
235 fragment length polymorphism (RFLP). All amplification types (Table 2) enable distribution and  
236 occupancy modelling, provided enough biological and technical replication is employed (Hunter  
237 et al., 2015; Goldberg, Strickler, & Fremier, 2018; Wilcox et al., 2018). However, endpoint PCR  
238 in combination with agarose gels is the only type where a detection limit cannot be set  
239 objectively (low sensitivity) and which does not provide estimates of DNA copy number (Doi,  
240 Uchii, et al., 2015; Yamanaka & Minamoto, 2016; Hunter et al., 2017; Thalinger, Wolf, Traugott,  
241 & Wanzenböck, 2019). Depending on the management context and study size, the optimal

242 detection instrument can vary, albeit technological advances will slowly shift the focus away  
243 from endpoint PCR.

244

245

#### 246 **4. Evaluating the current status of assay validation**

247

248 To understand current validation practices for targeted eDNA assays, we generated an  
249 extensive list of variables deemed important for assay validation by 35 experts in the field of  
250 targeted eDNA detection whom convened at a DNAqua-Net EU COST Action (Leese et al.,  
251 2016) workshop held on 26-27 March 2018 at the University of Innsbruck, Austria. The variables  
252 in this list consist of 18 categorical variables (e.g., species identity, target gene, sample type)  
253 and 104 binomial variables directly associated with the eDNA processing chain, from primer  
254 design to interpretation of field study results (SI1).

255 A comprehensive literature database for targeted eDNA assays was built in three steps.  
256 First, we included all papers listed on the 'eDNA assays' web page  
257 (<https://labs.wsu.edu/edna/edna-assays/>) as of 10 April 2019. Second, we conducted a Web of  
258 Science literature search on 11 April 2019, including the search terms "environmental DNA" and  
259 "eDNA" but excluding terms associated with microbial organisms and metabarcoding (SI2A).  
260 Third, the resulting 660 Web of Science entries were manually checked for suitability (i.e.  
261 macrobial target organism, targeted eDNA detection intended) leading to a combined database  
262 of 327 papers. For each of the assays contained in these papers, the 122 variables were  
263 recorded in a checklist by one of the authors. Before data entry, all authors validated the same  
264 four papers (Deiner & Altermatt, 2014; Rees, Bishop, et al., 2014; Thalinger et al., 2016; L. R.  
265 Harper, Griffiths, et al., 2019) to ensure recorder standardisation. Validation efforts were  
266 classified as 1 for "tests done, or parameter reported", 0 for "variable not reported, or no testing  
267 done", and NA in cases where the respective variable did not match the assay type (e.g. filter

268 type when samples were precipitated). When an assay was used in multiple papers, all  
269 validation efforts were summarised in one entry and the literature database was extended with  
270 the papers reporting primer sequences or other methodological aspects. As the type of  
271 amplification is important for assay validation, primer pairs used on multiple detection platforms  
272 were given separate database entries per amplification type. However, because most assays  
273 developed were presented in one publication, we did not account for slight variations in other  
274 aspects of the workflow (e.g. different extraction method, different filter type). After recording the  
275 values for each eDNA assay using the validation checklist (SI1), each author scored the assay  
276 intuitively based on a preliminary version of the validation scale (see section 5). The resulting  
277 database of 122 variables for each assay was the basis for all further analyses using R (R Core  
278 Team, 2019) and associated packages (SI2B).

279 Altogether, 546 assays from 327 papers were assessed. Of these assays, 227 were  
280 designed to detect fish species and 74 were designed to detect amphibian species; hence, it is  
281 unsurprising that ~80% of assays utilised water sampling. Fourteen percent of the assays were  
282 tested on tissue only and few assays were optimised for other sample types such as aerosol,  
283 sediment, snow or soil. More than 80% of assays were reported in only one paper, and most  
284 were designed for qPCR (~60%) or endpoint PCR (~35%) platforms. The cytochrome c oxidase  
285 subunit I (*COI*) gene was the most popular (>40%) genetic marker, followed by the cytochrome  
286 b (*cytb*) gene (~23%) (SI3).

287

288

## 289 **5. The 5-level assay validation scheme**

290

291 To enable standardised assay validation and reporting in the future, we assigned the assay-  
292 specific variables to 14 thematic blocks such as “*in silico* analysis”, “PCR”, or “extensive field  
293 testing of environmental samples” (Table 3, Fig. 1). These blocks were placed on a five-level



294 scale enabling the categorisation of assays from Level 1 (“incomplete”) to Level 5  
295 (“operational”), and the interpretation of associated field study results (Fig. 1). Each of these  
296 blocks contained variables associated with either rudimentary or substantial validation and  
297 reporting. For instance, the thematic block “concentration of eDNA from environmental sample”  
298 contains the variable “volume/weight of environmental sample”, which was reported for almost  
299 all assays, but also contains “pressure used for filtration”, which was rarely reported and/or  
300 measured. Therefore, a minimum criterion was introduced for each variable block functioning as  
301 proof of validation. For example, “detection from an environmental sample” was used as  
302 evidence that some validation had been undertaken in the block “detection obtained from  
303 environmental samples” (Table 3). To reach a level on the validation scale, an assay must fulfil  
304 all minimum reporting criteria for that level. For each assay, we calculated a total scoring  
305 percentage and a block scoring percentage for the 14 blocks by dividing the number of variables  
306 tested or reported by the complete set of variables possible. The total possible for each  
307 percentage included only variables relevant to the applied methods (e.g., for assays using  
308 filtration, precipitation variables were omitted; see Box 1 for example assays).

309 Of the 546 assays analysed, the majority (30%) were classed as Level 1. Of the remainder,  
310 15% ( $N = 83$ ) did not fulfil the minimum criteria necessary to reach Level 1, and no assay  
311 reached Level 5 (Fig. 1 and Fig. 2A). Newer assays published after 2016 were more likely to  
312 reach Level 4, and the percentage of assays failing to reach Level 1 gradually declined since  
313 2014 (Fig. 2B). Generally, the total scoring percentage for all variables in a level increased from  
314 Level 0 to Level 4, but its variation was non-uniform with most outliers observed at Level 2  
315 (Fig. 2C). Assays not reaching Level 1 exhibited scoring percentages between ~20% and ~55%,  
316 clearly showing the difference between incomplete and partially validated assays, which did not  
317 achieve higher levels due to one or several missing validation step(s). Generally, variables  
318 associated with lower levels on the validation scale were more likely to be reported or tested.

319 Nevertheless, some variables (e.g. “haplotypes of target tissue” or “pressure used for filtration”),  
320 were addressed by fewer than 10% of assays (Fig. 2D).

321 The rigour of the minimum criteria was evaluated by tallying the not achieved or reported  
322 cases. Specifically, 62 assays did not reach Level 1 because the targeted species sequence(s)  
323 used in primer design were not reported, which is a prerequisite for this level. Eight assays did  
324 not report the primer sequence. The lack of target detection from an environmental sample and  
325 omission of filter type or precipitation chemicals were the most restrictive criteria and were not  
326 fulfilled by 80 and 43 assays respectively, most of which were exclusively used for tissue tests  
327 (Fig. 2E). For assays ranked at Levels 2 and 3, there was agreement between the intuitive  
328 assay rating provided by the recorder and that assigned by the objective criteria. For assays  
329 placed at Level 1 following objective criteria, authors tended to be more liberal and rated them  
330 one or two levels higher (SI4). Finally, a classification tree analysis (De’Ath & Fabricius, 2000)  
331 was carried out to identify common characteristics of assays placed at each level of the  
332 validation scale (SI5). Most assays failing to reach Level 1 showed distinctly low levels of *in*  
333 *silico* validation. This was also true for most Level 1 assays ( $N = 103$ ), albeit these showed  
334 higher levels of target tissue validation (Fig. 3). On the other end of the spectrum, Level 4  
335 assays were characterised by substantial testing or reporting for *in vitro* testing, field sample  
336 processing, LOD determination, PCR, and field testing.

337

338

## 339 **6. Conclusions and outlook**

340

341 The validation scale and reporting standards developed here are an inclusive set of guidelines  
342 for targeted eDNA assays. They are directed at both the scientific community and end-users  
343 who want to apply a previously published assay or develop and publish a new assay. One  
344 needs to acknowledge that a strict standardisation of eDNA assays will not be possible due to

345 applications for manifold taxa in diverse ecosystems combined with technological advances. By  
346 checking which of the 122 validation variables have been addressed, it is possible to identify  
347 both available and missing information needed to successfully develop or reuse an assay. As a  
348 general recommendation, authors should report as much information as possible on the  
349 conducted validation steps, either in the main text or in the supplementary material. Additionally,  
350 developers should consult existing guidelines for best practices along the validation workflow  
351 prior to assay design and fieldwork (Bustin et al., 2009; Goldberg et al., 2016; MacDonald &  
352 Sarre, 2017; Klymus et al., 2019). To make the validation process accessible, we provide a  
353 checklist in SI1. Furthermore, a website (<https://edna-validation.com/>) was created to  
354 summarise the cornerstones of the validation process and the validation scale. It will be possible  
355 to enter all 122 variables and the minimum criteria to rank assays and calculate their scoring  
356 percentages on the scale. The website will also serve as a living document when improvements  
357 in technology and/or our understanding of eDNA in the environment advance.

358 The 5-level validation scale designed here provides an overview of the capabilities and  
359 uncertainties of targeted eDNA assays. However, the binary data entry system cannot replace a  
360 close check of previous publications as it does not always allow a qualitative assessment.  
361 Details for validation variables are often spread across different sections in a publication or  
362 ambiguously displayed. Thus, the checklist can be used as standard reporting guidelines for  
363 targeted eDNA assays. It should be emphasised that for specific research questions and  
364 associated publications, minimal validation efforts may be sufficient. Nevertheless, thorough  
365 validation is needed to reduce uncertainties and overcome the limitations associated with  
366 eDNA-based species monitoring. Furthermore, it is important that practitioners consider how an  
367 assay can be modified (e.g. using different PCR reagents) and whether this changes its  
368 validation level.

369 The successful application of targeted eDNA assays for routine species detection and  
370 monitoring largely depends on the scientific community and the industry providing eDNA

371 services. Laboratories participating in ring tests such as that proposed for metabarcoding  
372 (Blackman et al., 2019) can facilitate consensus on analysis standards. For now, assay  
373 developers must respond to queries and help troubleshoot reproducibility issues. Such  
374 engagement will facilitate the application of targeted eDNA assays by other users and outside  
375 their original geographic scope or academic context. Finally, it is necessary for both the  
376 scientific community and the commercial laboratories to communicate realistic applications and  
377 limitations to end-users, as often an assay is not bad *per se*, but simply unsuitable.

378

379

### 380 **Acknowledgements**

381

382 This article is based upon work from COST Action DNAqua-Net (CA15219), supported by the  
383 COST (European Cooperation in Science and Technology) programme. We thank the workshop  
384 participants who convened on 26-27 March 2018 at the University of Innsbruck, Austria, where  
385 initial brainstorming for this manuscript occurred. We acknowledge additional guidance and  
386 input from Micaela Hellström, and are grateful to Cathryn Abbott for the improved design of  
387 Fig.1. We thank Nature Metrics Ltd. for support in hosting the independent website formed to  
388 operationalise the validation scale for future use.

389

390

### 391 **Author's contributions**

392

393 KB conceived the original idea which was developed by all co-authors. BT compiled the  
394 literature database and BT, KD, LRH, HCR, RCB, DS, MT, and KB collected the data. BT  
395 analysed the data and led the writing of the manuscript for which first drafts of sections were

396 provided by LH, RCB and KD. All authors contributed critically to the drafts and gave final  
397 approval for publication.

398

399

#### 400 **Data availability**

401

402 The literature database, the validation checklist compiled from it, the R code, and seven  
403 datasets derived from the checklist and used for analyses are available on Figshare at  
404 <https://doi.org/10.6084/m9.figshare.12184860.v1> The literature database, the validation scale,  
405 and the full checklist are also available at <https://edna-validation.com/>.

406

407

#### 408 **Conflict of interest**

409

410 KB is the co-founder and CEO of Nature Metrics Ltd. a for profit company dedicated to the  
411 analysis of environmental DNA. HCR manages environmental DNA services for RSK ADAS Ltd.  
412 a for profit environmental consultancy. DS and MT are co-founders of Sinsoma GmbH. a for  
413 profit company dedicated to the analysis of environmental DNA.

414

415 **References**

- 416
- 417 Agersnap, S., Larsen, W. B., Knudsen, S. W., Strand, D., Thomsen, P. F., Hesselsøe, M., ...
- 418 Møller, P. R. (2017). Monitoring of noble, signal and narrow-clawed crayfish using
- 419 environmental DNA from freshwater samples. *PLOS ONE*, *12*(6), e0179261.
- 420 doi:10.1371/journal.pone.0179261
- 421 Barnes, M. A., & Turner, C. R. (2016). The ecology of environmental DNA and implications for
- 422 conservation genetics. *Conservation Genetics*, *17*(1), 1–17. doi:10.1007/s10592-015-0775-
- 423 4
- 424 Biggs, J., Ewald, N., Valentini, A., Gaboriaud, C., Dejean, T., Griffiths, R. A., ... Dunn, F. (2015).
- 425 Using eDNA to develop a national citizen science-based monitoring programme for the
- 426 great crested newt (*Triturus cristatus*). *Biological Conservation*, *183*, 19–28.
- 427 doi:10.1016/j.biocon.2014.11.029
- 428 Blackman, R., Mächler, E., Altermatt, F., Arnold, A., Beja, P., Boets, P., ... Deiner, K. (2019).
- 429 Advancing the use of molecular methods for routine freshwater macroinvertebrate
- 430 biomonitoring – the need for calibration experiments. *Metabarcoding and Metagenomics*, *3*,
- 431 e34735. doi:10.3897/mbmg.3.34735
- 432 Boyer, F., Mercier, C., Bonin, A., Le Bras, Y., Taberlet, P., & Coissac, E. (2016). obitools: A
- 433 unix-inspired software package for DNA metabarcoding. *Molecular Ecology Resources*,
- 434 *16*(1), 176–182. doi:10.1111/1755-0998.12428
- 435 Bustin, S. A., Benes, V., Garson, J. A., Hellemans, J., Huggett, J., Kubista, M., ... Wittwer, C. T.
- 436 (2009). The MIQE guidelines: Minimum information for publication of quantitative real-time
- 437 PCR experiments. *Clinical Chemistry*, *55*(4), 611–622. doi:10.1373/clinchem.2008.112797
- 438 Buxton, A. S., Groombridge, J., & Griffiths, R. (2018a). Comparison of Two Citizen Scientist
- 439 Methods for Collecting Pond Water Samples for Environmental DNA Studies. *Citizen*
- 440 *Science: Theory and Practice*, *3*(2). doi:10.5334/cstp.151

- 441 Buxton, A. S., Groombridge, J. J., & Griffiths, R. A. (2017). Is the detection of aquatic  
442 environmental DNA influenced by substrate type? *PLOS ONE*, *12*(8), e0183371.  
443 doi:10.1371/journal.pone.0183371
- 444 Buxton, A. S., Groombridge, J. J., & Griffiths, R. A. (2018b). Seasonal variation in environmental  
445 DNA detection in sediment and water samples. *PLOS ONE*, *13*(1).  
446 doi:10.1371/journal.pone.0191737
- 447 Buxton, A. S., Groombridge, J. J., Zakaria, N. B., & Griffiths, R. A. (2017, April 10). Seasonal  
448 variation in environmental DNA in relation to population size and environmental factors.  
449 *Scientific Reports*. Nature Publishing Group. doi:10.1038/srep46294
- 450 Cannon, M. V., Hester, J., Shalkhauser, A., Chan, E. R., Logue, K., Small, S. T., & Serre, D.  
451 (2016). In silico assessment of primers for eDNA studies using PrimerTree and application  
452 to characterize the biodiversity surrounding the Cuyahoga River. *Scientific Reports*, *6*.  
453 doi:10.1038/srep22908
- 454 De'Ath, G., & Fabricius, K. E. (2000). Classification and regression trees: A powerful yet simple  
455 technique for ecological data analysis. *Ecology*, *81*(11), 3178–3192. doi:10.1890/0012-  
456 9658(2000)081[3178:CARTAP]2.0.CO;2
- 457 de Souza, L. S., Godwin, J. C., Renshaw, M. A., & Larson, E. (2016). Environmental DNA  
458 (eDNA) detection probability is influenced by seasonal activity of organisms. *PLOS ONE*,  
459 *11*(10), e0165273. doi:10.1371/journal.pone.0165273
- 460 Deiner, K., & Altermatt, F. (2014). Transport distance of invertebrate environmental DNA in a  
461 natural river. *PLOS ONE*, *9*(2). doi:10.1371/journal.pone.0088786
- 462 Deiner, K., Bik, H. M., Mächler, E., Seymour, M., Lacoursière-Roussel, A., Altermatt, F., ...  
463 Bernatchez, L. (2017). Environmental DNA metabarcoding: Transforming how we survey  
464 animal and plant communities. *Molecular Ecology*, *26*(21), 5872–5895.  
465 doi:10.1111/mec.14350
- 466 Doi, H., Katano, I., Sakata, Y., Souma, R., Kosuge, T., Nagano, M., ... Tojo, K. (2017).

- 467           Detection of an endangered aquatic heteropteran using environmental DNA in a wetland  
468           ecosystem. *Royal Society Open Science*, 4(7). doi:10.1098/rsos.170568
- 469   Doi, H., Takahara, T., Minamoto, T., Matsuhashi, S., Uchii, K., & Yamanaka, H. (2015). Droplet  
470           digital polymerase chain reaction (PCR) outperforms real-time PCR in the detection of  
471           environmental DNA from an invasive fish species. *Environmental Science and Technology*,  
472           49(9), 5601–5608. doi:10.1021/acs.est.5b00253
- 473   Doi, H., Uchii, K., Takahara, T., Matsuhashi, S., Yamanaka, H., & Minamoto, T. (2015). Use of  
474           droplet digital PCR for estimation of fish abundance and biomass in environmental DNA  
475           surveys. *PLOS ONE*, 10(3), 1–11. doi:10.1371/journal.pone.0122763
- 476   Dorazio, R. M., & Erickson, R. A. (2018). ednaoccupancy: An R package for multiscale  
477           occupancy modelling of environmental DNA data. *Molecular Ecology Resources*, 18(2),  
478           368–380. doi:10.1111/1755-0998.12735
- 479   Dunn, N., Priestley, V., Herraiz, A., Arnold, R., & Savolainen, V. (2017). Behavior and season  
480           affect crayfish detection and density inference using environmental DNA. *Ecology and  
481           Evolution*, 7(19), 7777–7785. doi:10.1002/ece3.3316
- 482   Elbrecht, V., & Leese, F. (2017). PrimerMiner: an R package for development and in silico  
483           validation of DNA metabarcoding primers. *Methods in Ecology and Evolution*, 8(5), 622–  
484           626. doi:10.1111/2041-210X.12687
- 485   Furlan, E. M., & Gleeson, D. (2017). Improving reliability in environmental DNA detection  
486           surveys through enhanced quality control. *Marine and Freshwater Research*, 68(2), 388.  
487           doi:10.1071/MF15349
- 488   Goldberg, C. S., Strickler, K. M., & Fremier, A. K. (2018). Degradation and dispersion limit  
489           environmental DNA detection of rare amphibians in wetlands: Increasing efficacy of  
490           sampling designs. *Science of the Total Environment*, 633, 695–703.  
491           doi:10.1016/j.scitotenv.2018.02.295
- 492   Goldberg, C. S., Turner, C. R., Deiner, K., Klymus, K. E., Thomsen, P. F., Murphy, M. A., ...



- 493 Taberlet, P. (2016). Critical considerations for the application of environmental DNA  
494 methods to detect aquatic species. *Methods in Ecology and Evolution*, 7(11), 1299–1307.  
495 doi:10.1111/2041-210X.12595
- 496 Halling, K. C., Schrijver, I., & Persons, D. L. (2012). Test verification and validation for molecular  
497 diagnostic assays. *Archives of Pathology and Laboratory Medicine*, 136(1), 11–13.  
498 doi:10.5858/arpa.2011-0212-ED
- 499 Harper, K. J., Anucha, N. P., Turnbull, J. F., Bean, C. W., & Leaver, M. J. (2018). Searching for  
500 a signal: Environmental DNA (eDNA) for the detection of invasive signal crayfish,  
501 *Pacifastacus leniusculus* (Dana, 1852). *Management of Biological Invasions*, 9(2), 137–  
502 148. doi:10.3391/mbi.2018.9.2.07
- 503 Harper, L. R., Buxton, A. S., Rees, H. C., Bruce, K., Brys, R., Halfmaerten, D., ... Hänfling, B.  
504 (2019). Prospects and challenges of environmental DNA (eDNA) monitoring in freshwater  
505 ponds. *Hydrobiologia*, 826(1), 25–41. doi:10.1007/s10750-018-3750-5
- 506 Harper, L. R., Griffiths, N. P., Lawson Handley, L., Sayer, C. D., Read, D. S., Harper, K. J., ...  
507 Hänfling, B. (2019). Development and application of environmental DNA surveillance for  
508 the threatened crucian carp ( *Carassius carassius* ). *Freshwater Biology*, 64(1), 93–107.  
509 doi:10.1111/fwb.13197
- 510 Hunter, M. E., Dorazio, R. M., Butterfield, J. S. S., Meigs-Friend, G., Nico, L. G., & Ferrante, J.  
511 A. (2017). Detection limits of quantitative and digital PCR assays and their influence in  
512 presence–absence surveys of environmental DNA. *Molecular Ecology Resources*, 17(2),  
513 221–229. doi:10.1111/1755-0998.12619
- 514 Hunter, M. E., Oyler-McCance, S. J., Dorazio, R. M., Fike, J. A., Smith, B. J., Hunter, C. T., ...  
515 Hart, K. M. (2015). Environmental DNA (eDNA) sampling improves occurrence and  
516 detection estimates of invasive Burmese pythons. *PLOS ONE*, 10(4), e0121655.  
517 doi:10.1371/journal.pone.0121655
- 518 Jerde, C. L. (2019). Can we manage fisheries with the inherent uncertainty from eDNA? *Journal*

- 519           of *Fish Biology*, jfb.14218. doi:10.1111/jfb.14218
- 520 Klymus, K. E., Merkes, C. M., Allison, M. J., Goldberg, C. S., Helbing, C. C., Hunter, M. E., ...
- 521           Richter, C. A. (2019). Reporting the limits of detection and quantification for environmental
- 522           DNA assays. *Environmental DNA*, edn3.29. doi:10.1002/edn3.29
- 523 Lacoursière-Roussel, A., & Deiner, K. (2019). Environmental DNA is not the tool by itself.
- 524           *Journal of Fish Biology*, jfb.14177. doi:10.1111/jfb.14177
- 525 Larson, E. R., Renshaw, M. A., Gantz, C. A., Umek, J., Chandra, S., Lodge, D. M., & Egan, S.
- 526           P. (2017). Environmental DNA (eDNA) detects the invasive crayfishes *Orconectes rusticus*
- 527           and *Pacifastacus leniusculus* in large lakes of North America. *Hydrobiologia*, 800(1), 173–
- 528           185. doi:10.1007/s10750-017-3210-7
- 529 Lawson Handley, L., Read, D. S., Winfield, I. J., Kimbell, H., Johnson, H., Li, J., ... Hänfling, B.
- 530           (2019). Temporal and spatial variation in distribution of fish environmental DNA in
- 531           England's largest lake. *Environmental DNA*, 1(1), 26–39. doi:10.1002/edn3.5
- 532 Leese, F., Altermatt, F., Bouchez, A., Ekrem, T., Hering, D., Meissner, K., ... Zimmermann, J.
- 533           (2016). DNAqua-Net: Developing new genetic tools for bioassessment and monitoring of
- 534           aquatic ecosystems in Europe. *Research Ideas and Outcomes*, 2, e11321.
- 535           doi:10.3897/rio.2.e11321
- 536 MacDonald, A. J., & Sarre, S. D. (2017). A framework for developing and validating taxon-
- 537           specific primers for specimen identification from environmental DNA. *Molecular Ecology*
- 538           *Resources*, 17(4), 708–720. doi:10.1111/1755-0998.12618
- 539 MacKenzie, D. I., Nichols, J. D., Lachman, G. B., Droege, S., Royle, A., & Langtimm, C. A.
- 540           (2002). Estimating site occupancy rates when detection probabilities are less than one.
- 541           *Ecology*, 83(8), 2248–2255.
- 542 Mauvisseau, Q., Coignet, A., Delaunay, C., Pinet, F., Bouchon, D., & Souty-Grosset, C. (2018).
- 543           Environmental DNA as an efficient tool for detecting invasive crayfishes in freshwater
- 544           ponds. *Hydrobiologia*, 805(1), 163–175. doi:10.1007/s10750-017-3288-y

- 545 Meusnier, I., Singer, G. A. C., Landry, J. F., Hickey, D. A., Hebert, P. D. N., & Hajibabaei, M.  
546 (2008). A universal DNA mini-barcode for biodiversity analysis. *BMC Genomics*, *9*.  
547 doi:10.1186/1471-2164-9-214
- 548 Natural England. (2015). Great crested newts: protection and licences. Retrieved 7 April 2020,  
549 from <https://www.gov.uk/guidance/great-crested-newts-protection-surveys-and-licences>
- 550 Nicholson, A., Mclsaac, D., MacDonald, C., Gec, P., Mason, B. E., Rein, W., ... Hanner, R. H.  
551 (2020). An analysis of metadata reporting in freshwater environmental DNA research calls  
552 for the development of best practice guidelines. *Environmental DNA*. doi:10.1002/edn3.81
- 553 R Core Team. (2019). R: A Language and Environment for Statistical Computing. Vienna,  
554 Austria: R Foundation for Statistical Computing. Retrieved from <https://www.r-project.org/>
- 555 Rees, H. C., Bishop, K., Middleditch, D. J., Patmore, J. R. M., Maddison, B. C., & Gough, K. C.  
556 (2014). The application of eDNA for monitoring of the Great Crested Newt in the UK.  
557 *Ecology and Evolution*, *4*(21), 4023–4032. doi:10.1002/ece3.1272
- 558 Rees, H. C., Maddison, B. C., Middleditch, D. J., Patmore, J. R. M., & Gough, K. C. (2014). The  
559 detection of aquatic animal species using environmental DNA - a review of eDNA as a  
560 survey tool in ecology. *Journal of Applied Ecology*, *51*(5), 1450–1459. doi:10.1111/1365-  
561 2664.12306
- 562 Robinson, C. V., Uren Webster, T. M., Cable, J., James, J., & Consuegra, S. (2018).  
563 Simultaneous detection of invasive signal crayfish, endangered white-clawed crayfish and  
564 the crayfish plague pathogen using environmental DNA. *Biological Conservation*, *222*,  
565 241–252. doi:10.1016/j.biocon.2018.04.009
- 566 Thalinger, B., Oehm, J., Mayr, H., Obwexer, A., Zeisler, C., & Traugott, M. (2016). Molecular  
567 prey identification in Central European piscivores. *Molecular Ecology Resources*, *16*(1),  
568 123–137. doi:10.1111/1755-0998.12436
- 569 Thalinger, B., Wolf, E., Traugott, M., & Wanzenböck, J. (2019). Monitoring spawning migrations  
570 of potamodromous fish species via eDNA. *Scientific Reports*, *9*(1). doi:10.1038/s41598-

- 571 019-51398-0
- 572 Thomsen, P. F., Kielgast, J., Iversen, L. L., Wiuf, C., Rasmussen, M., Gilbert, M. T. P., ...  
573 Willerslev, E. (2012). Monitoring endangered freshwater biodiversity using environmental  
574 DNA. *Molecular Ecology*, 21(11), 2565–2573. doi:10.1111/j.1365-294X.2011.05418.x
- 575 Wilcox, T. M., Carim, K. J., McKelvey, K. S., Young, M. K., & Schwartz, M. K. (2015). The dual  
576 challenges of generality and specificity when developing environmental DNA markers for  
577 species and subspecies of *Oncorhynchus*. *PLOS ONE*, 10(11), e0142008.  
578 doi:10.1371/journal.pone.0142008
- 579 Wilcox, T. M., Young, M. K., McKelvey, K. S., Isaak, D. J., Horan, D. L., & Schwartz, M. K.  
580 (2018). Fine-scale environmental DNA sampling reveals climate-mediated interactions  
581 between native and invasive trout species. *Ecosphere*, 9(11), e02500.  
582 doi:10.1002/ecs2.2500
- 583 Williams, M. A., O’Grady, J., Ball, B., Carlsson, J., de Eyto, E., McGinnity, P., ... Parle-  
584 McDermott, A. (2019). The application of CRISPR-Cas for single species identification from  
585 environmental DNA. *Molecular Ecology Resources*, 19(5), 1106–1114. doi:10.1111/1755-  
586 0998.13045
- 587 Williams, M. R., Stedtfeld, R. D., Engle, C., Salach, P., Fakher, U., Stedtfeld, T., ... Hashsham,  
588 S. A. (2017). Isothermal amplification of environmental DNA (eDNA) for direct field-based  
589 monitoring and laboratory confirmation of *Dreissena* sp. *PLOS ONE*, 12(10).  
590 doi:10.1371/journal.pone.0186462
- 591 World Health Organization. (2011). *Laboratory quality standards and their implementation*. New  
592 Delhi: WHO Regional Office for the Western Pacific.
- 593 Yamanaka, H., & Minamoto, T. (2016). The use of environmental DNA of fishes as an efficient  
594 method of determining habitat connectivity. *Ecological Indicators*, 62, 147–153.  
595 doi:10.1016/j.ecolind.2015.11.022
- 596 Ye, J., Coulouris, G., Zaretskaya, I., Cutcutache, I., Rozen, S., & Madden, T. L. (2012). Primer-

597 BLAST: a tool to design target-specific primers for polymerase chain reaction. *BMC*

598 *Bioinformatics*, 13, 134. doi:10.1186/1471-2105-13-134

599

## 600 **Tables and Figures**

601

602 **Table 1:** A guideline for troubleshooting at different stages of the validation process.

603

604 **Table 2:** Detection methods and their trade-offs used for targeted eDNA assays. Abbreviations  
605 are as follows: polymerase chain reaction (PCR), capillary electrophoresis (CE), quantitative (q),  
606 intercalating dye (ID), loop-mediated isothermal amplification (LAMP).

607

608 **Table 3:** The thematic variable blocks of the 5-level validation scale and their respective  
609 minimum criteria.

610

611 **Figure 1:** An overview of the 5-level validation scale. For each of the levels (incomplete to  
612 operational), the main accomplishments in the validation process and an appropriate  
613 interpretation of results are provided.

614

615 **Figure 2:** The main outcomes of the meta-analysis based on 546 assays from 327 publications  
616 are presented in panels A to E. Assay classification is based on the minimum criteria presented  
617 in Figure 1. Level 0 codes for assays that did not reach Level 1 on the validation scale. The  
618 colour coding is consistent for all panels: Level 0 (grey), Level 1 (dark purple), Level 2 (blue),  
619 Level 3 (turquoise), Level 4 (green), and Level 5 (yellow). Panel A shows the distribution of  
620 assays across levels of the validation scale. Panel B displays the percentage of assays ( $N =$   
621 546) rated Level 0 to 4 that have been published each year since 2003. Panel C summarises  
622 variable reporting per assay level. Panel D shows the percentage of assays reporting a specific  
623 variable (colour-coded according to level). Panel E shows the minimum criteria necessary to  
624 reach each level of the validation scale, and the percentage of Level 0 to 4 assays that did not  
625 report these. All variable abbreviations are listed in SI1.

626

627 **Figure 3:** Classification tree analysis identifying the criteria distinguishing assays at different  
628 levels of the validation scale. The conditions along the branches show the criteria on which the  
629 dataset is split. Numbers in coloured leaves show the validation level of the assays in the  
630 respective leaf. Numbers below the leaves represent the number of assays per validation level,  
631 summarised inside an individual leaf. The displayed percentage is the proportion of assays  
632 summarised per leaf.

633

634 **Box 1:** Examples of assays rated at Levels 0 to 4. The vertical tile plot shows which of the  
635 minimum criteria the assay fulfils (yellow tiles), and the bar chart gives the scoring percentage  
636 (i.e. the proportion of variables that were tested or reported) for each of the variable blocks.  
637 Bars are coloured according to the score obtained from a block with dark purple coding for “no  
638 validation” and yellow coding for “comprehensive validation”.

**Table 1:**

| General issues                                     | <i>In silico</i> validation                                                                                   | <i>In vitro</i> validation                                                                                                                          | <i>In situ</i> validation                                                                                                                                                                        |
|----------------------------------------------------|---------------------------------------------------------------------------------------------------------------|-----------------------------------------------------------------------------------------------------------------------------------------------------|--------------------------------------------------------------------------------------------------------------------------------------------------------------------------------------------------|
| <b>Applying assay to a new geographic location</b> | Test non-target sequences available on public/custom databases from this location                             | Test tissue from non-target species present at this location, including species present at original location if populations are genetically diverse |                                                                                                                                                                                                  |
| <b>Sparse reference data</b>                       | Where possible, Sanger sequence tissue DNA from target and non-target species to generate reference sequences | Extensively test assay on tissue available for target and non-target species, i.e. test extracts from multiple individuals                          | Extensively test assay at sites where target species co-occurs with non-target species lacking reference sequences, and at sites where only non-target species lacking reference sequences occur |

| <i>In vitro</i> validation issues                     | Troubleshooting guidelines                                                                         | <i>In situ</i> validation issues                       | Troubleshooting guidelines                                                                   |                                                                                                                                                                             |
|-------------------------------------------------------|----------------------------------------------------------------------------------------------------|--------------------------------------------------------|----------------------------------------------------------------------------------------------|-----------------------------------------------------------------------------------------------------------------------------------------------------------------------------|
| <b>Poor amplification efficiency</b>                  | Optimise reaction volume                                                                           | <b>Expected species presence/absence not confirmed</b> | Survey sites with conventional tools and eDNA metabarcoding if possible                      |                                                                                                                                                                             |
|                                                       | Optimise cycle number                                                                              |                                                        |                                                                                              |                                                                                                                                                                             |
|                                                       | Optimise primer-probe concentration                                                                |                                                        | <b>False positives</b>                                                                       | Discard samples corresponding to contaminated controls; consider lack of specificity; Sanger sequence results                                                               |
|                                                       | Optimise annealing temperature using gradient PCR                                                  |                                                        |                                                                                              | Resample with more stringent decontamination measures in place                                                                                                              |
|                                                       | Optimise technical replication                                                                     |                                                        |                                                                                              |                                                                                                                                                                             |
| <b>Poor specificity</b>                               | Check pipetting accuracy                                                                           | <b>False negatives</b>                                 | Check for inhibition and treat samples if inhibited; consider timing and spacing of sampling |                                                                                                                                                                             |
|                                                       | Increase annealing temperature                                                                     |                                                        | Increase technical replication                                                               |                                                                                                                                                                             |
|                                                       | Add hydrolysis probe                                                                               |                                                        |                                                                                              |                                                                                                                                                                             |
| <b>Low sensitivity (see also Klymus et al., 2019)</b> | Perform melting curve analysis                                                                     | <b>Poor quality Sanger sequencing</b>                  | Resample and increase biological replication and volume of water collected                   |                                                                                                                                                                             |
|                                                       | Consider redesign                                                                                  |                                                        | Purify amplicons prior to sequencing                                                         |                                                                                                                                                                             |
|                                                       | Ensure enough replication of fresh standards used when establishing the Limit of Detection         |                                                        | Concentrate amplicons prior to sequencing                                                    |                                                                                                                                                                             |
|                                                       | Use TE buffer and tRNA to make standard dilutions, not molecular grade water                       |                                                        | <b>Inhibition (determined by failed/skewed amplification of IPC or non-target assay)</b>     | Use a DNA extraction kit that includes an inhibitor removal step (e.g. mu-DNA, Qiagen QIAamp DNA Stool Mini Kit, Qiagen DNeasy PowerWater Kit, Qiagen DNeasy PowerSoil Kit) |
|                                                       | Use low retention tubes and pipette tips when preparing standards to prevent adsorption to plastic |                                                        |                                                                                              | Apply an inhibitor removal kit (e.g. Zymo) to samples                                                                                                                       |
|                                                       | If possible, switch to PCR platform with greater sensitivity                                       |                                                        |                                                                                              | Use PCR reagents designed to handle inhibition (e.g. TaqMan Environmental Master Mix, Bovine Serum Albumin)                                                                 |
| Consider redesign                                     |                                                                                                    |                                                        |                                                                                              |                                                                                                                                                                             |



**Table 2:**

| <b>Trade-offs</b>              | <b>Endpoint PCR-gel</b>                                                | <b>Endpoint PCR-CE</b>                                      | <b>qPCR-ID</b>     | <b>qPCR-probe</b>               | <b>dPCR-ID</b>          | <b>dPCR-probe</b>               | <b>LAMP</b>                             |
|--------------------------------|------------------------------------------------------------------------|-------------------------------------------------------------|--------------------|---------------------------------|-------------------------|---------------------------------|-----------------------------------------|
| <b>Quantification</b>          | no                                                                     | yes                                                         | yes                | yes                             | yes                     | yes                             | yes, with real-time monitoring          |
| <b>LOD (sensitivity)</b>       | medium - high DNA concentration (depending on which intercalating dye) | low - medium DNA concentration (with a well designed assay) | low DNA quantities | low DNA quantities              | absolute DNA quantities | absolute DNA quantities         | medium DNA concentration                |
| <b>Specificity</b>             | medium                                                                 | medium                                                      | medium             | high                            | medium                  | high                            | high                                    |
| <b>Cost reagents</b>           | low                                                                    | medium                                                      | high               | high                            | high                    | very high                       | medium                                  |
| <b>Cost equipment</b>          | low                                                                    | medium                                                      | medium             | medium                          | high                    | high                            | low - medium (depending on LAMP cycler) |
| <b>Multiplex possible</b>      | yes, if different sizes are used                                       | yes, if different sizes or dyes are used                    | difficult          | yes, if different dyes are used | difficult               | yes, if different dyes are used | yes                                     |
| <b>Time (PCR to data)</b>      | slow                                                                   | slow                                                        | medium             | medium                          | slow                    | slow                            | fast (15-30 min)                        |
| <b>Assay type transferable</b> | yes                                                                    | yes                                                         | yes                | yes                             | yes to qPCR             | yes to qPCR                     | not easily                              |
| <b>Effort to design assay</b>  | low - medium                                                           | low - medium                                                | high               | high                            | high                    | high                            | high                                    |
| <b>Specialised software</b>    | advisable                                                              | advisable                                                   | advisable          | required                        | advisable               | required                        | required                                |
| <b>Sequencing confirmation</b> | yes                                                                    | yes                                                         | yes                | yes                             | limited                 | limited                         | limited                                 |

**Table 3:**

| Validation level | Variable blocks                                                                   | Minimum criteria                                                       |
|------------------|-----------------------------------------------------------------------------------|------------------------------------------------------------------------|
| Level 1          | <i>in silico</i> analysis                                                         | target species                                                         |
|                  | target tissue testing                                                             | target tissue                                                          |
|                  | target tissue PCR                                                                 | primer (and probe) sequence                                            |
| Level 2          | comprehensive reporting of PCR conditions                                         | DNA extract volume in PCR                                              |
|                  | <i>in vitro</i> testing on closely related non-target species                     | any <i>in vitro</i> non-target testing                                 |
| Level 3          | extraction method performed on eDNA samples                                       | method of extraction                                                   |
|                  | concentration of eDNA from environmental sample                                   | filter type or precipitation chemicals                                 |
|                  | detection obtained from environmental samples                                     | detection from an environmental sample (artificial or natural habitat) |
| Level 4          | Limit of Detection (LOD)                                                          | LOD determined                                                         |
|                  | extensive field testing of environmental samples                                  | multiple locations or multiple samples                                 |
|                  | <i>in vitro</i> testing on co-occurring non-target species                        | any advanced <i>in vitro</i> testing                                   |
| Level 5          | comprehensive specificity testing                                                 | non-co-occurring/closely related species checked from <i>in silico</i> |
|                  | detection probability estimation from statistical modelling                       | any effort made towards detection probability estimation               |
|                  | understanding ecological and physical factors influencing eDNA in the environment | any factor influencing eDNA in the environment tested                  |

Figure 1

Level 1  
incomplete

Level 2  
partial

Level 3  
essential

Level 4  
substantial

Level 5  
operational

**assay designed**  
tested on target tissue

Level 1  
+  
**assay optimized**  
tested on closely related  
non-target species

Level 2  
+  
**assay tested on eDNA  
samples**  
positive detections obtained  
all sample processing steps  
reported in detail

Level 3  
+  
**Limit of Detection (LOD)  
established**  
extensive field testing and *in  
vitro* testing on co-occurring  
non-target species

Level 4  
+  
**detection probabilities  
estimated by statistical  
modelling**  
comprehensive specificity  
testing and investigating  
environmental influences

### Interpretation of Results

#### Levels 1 and 2

impossible to tell if target is present or absent

#### Level 3

not detected: impossible to tell if target is present or absent

detected: target is likely present if

- field negative controls return negative
- eDNA-appropriate laboratory
- positive detections are sequenced

#### Levels 4 and 5

not detected: target likely absent, assuming appropriate timing and replication in sampling; Level 5 provides the probability of species presence despite negative results

detected: target very likely present

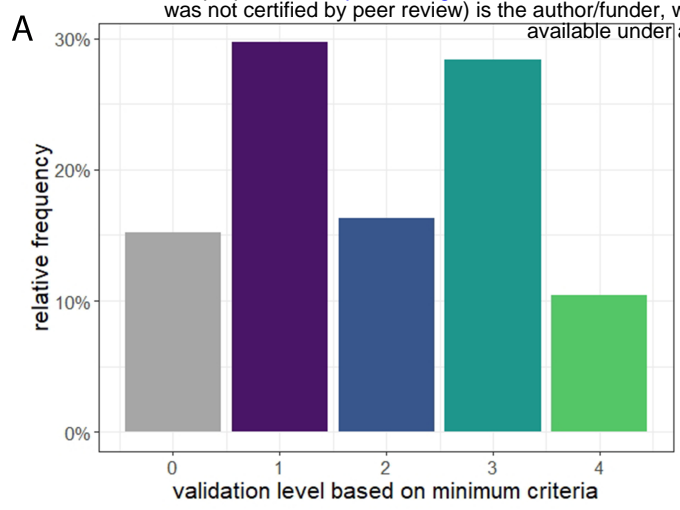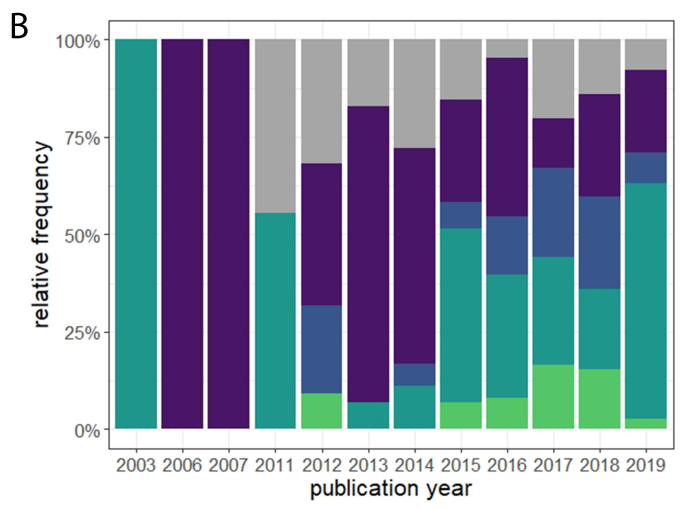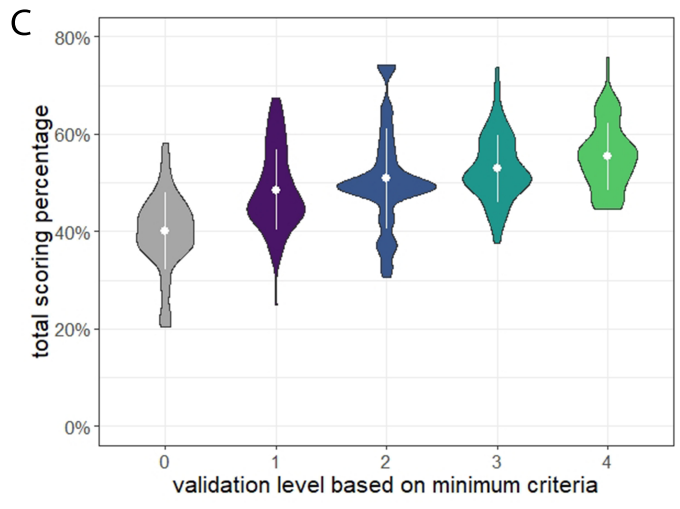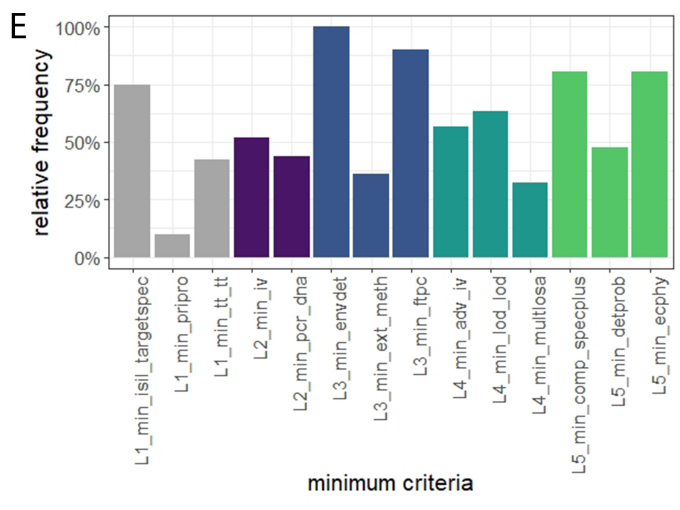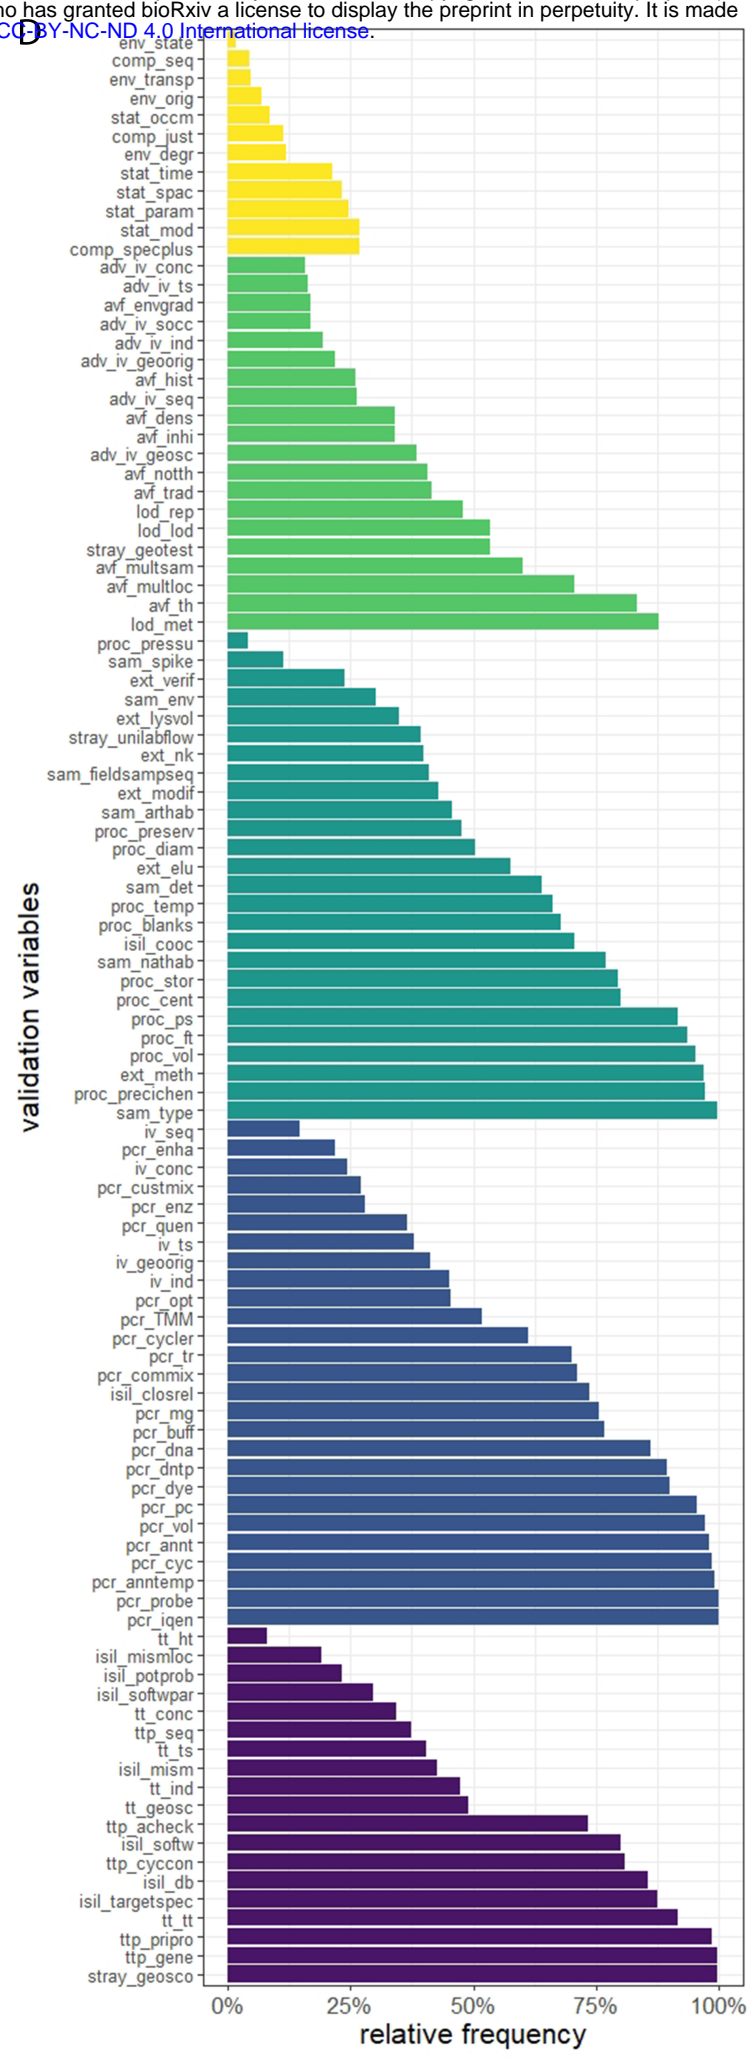

Figure 3:

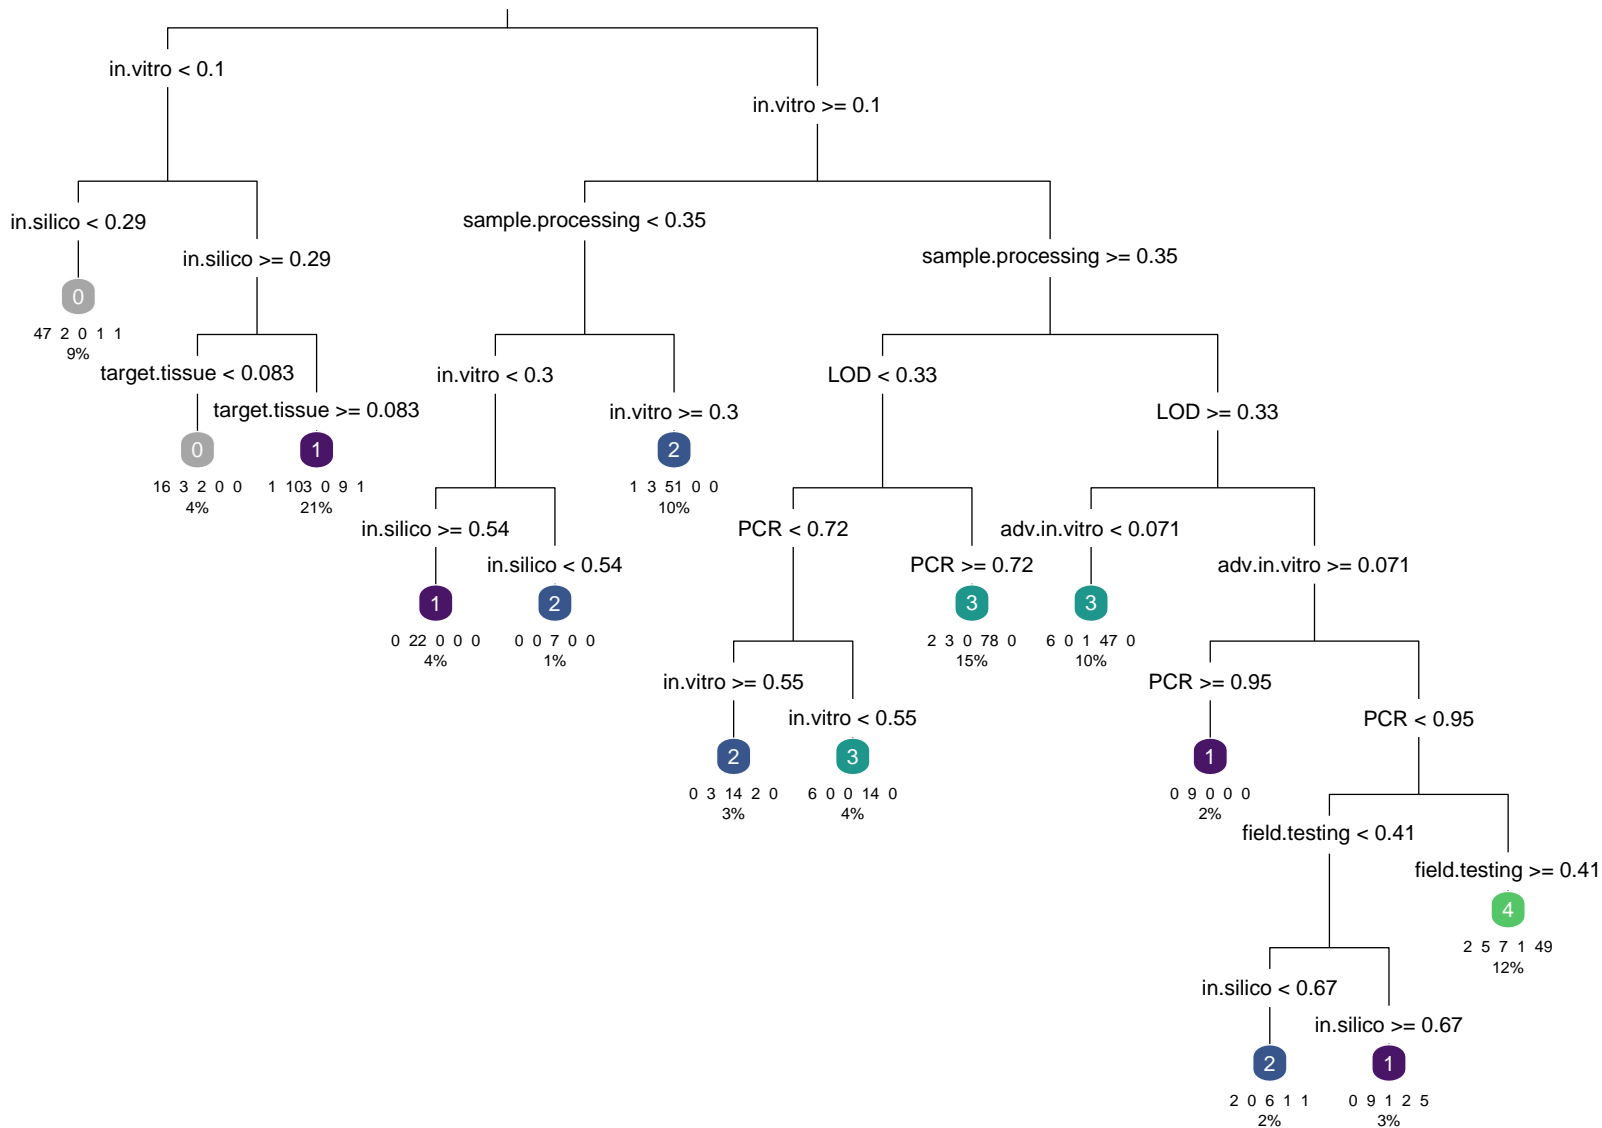

## Box 1:

**Level 4:** Assay no. 165 detecting brook trout, *Salvelinus fontinalis*. Assay information was published in paper nos. 291, 12, 145, 295, 144, with latest publication in 2018. Despite low validation efforts for *in vitro* testing and field detection, the only minimum criterion that prevented this assay attaining Level 5 was “comprehensive specificity testing”.

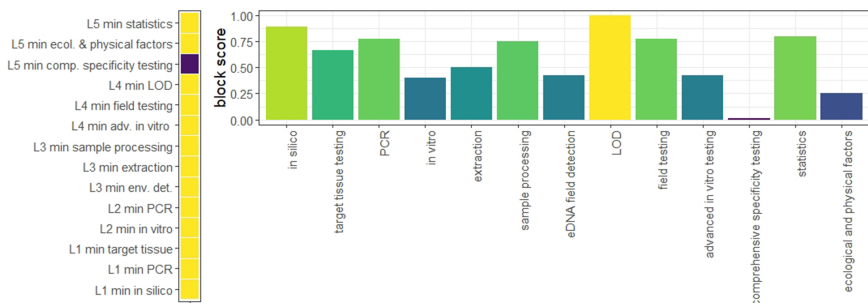

**Level 3:** Assay no. 473 detecting the crucian carp, *Carassius carassius*. Assay information was published in paper no. 119 in 2019. No advanced *in vitro* testing was conducted for this assay, but validation efforts were substantial for most thematic blocks, especially “*in silico* testing”, “LOD determination”, and “comprehensive specificity testing”.

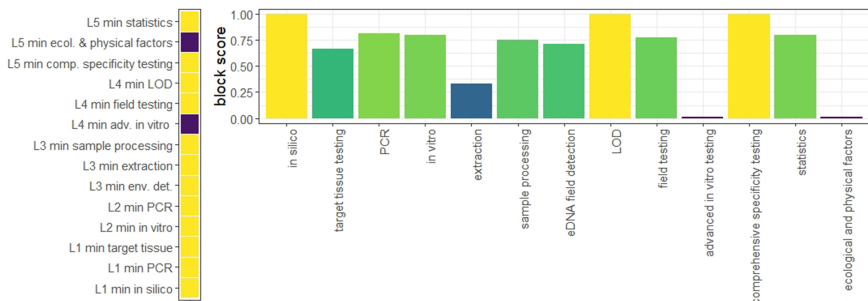

**Level 2:** Assay no. 270 detecting common eelgrass, *Zostera marina*. Assay information was published in paper no. 117 in 2018. Despite low validation efforts in many thematic blocks, only the minimum criterion of “sample processing” prevented this assay from reaching Level 4 on the validation scale

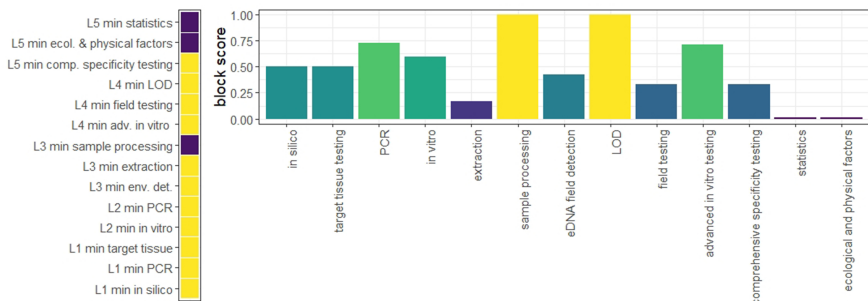

**Level 1:** Assay no. 315 detecting the waterlouse, *Asellus aquaticus*. Assay information was published in paper no. 163 in 2015. With additional *in vitro* testing, this assay would have attained Level 3. A clear decrease in validation efforts is visible for variable blocks associated with higher levels of the validation scale.

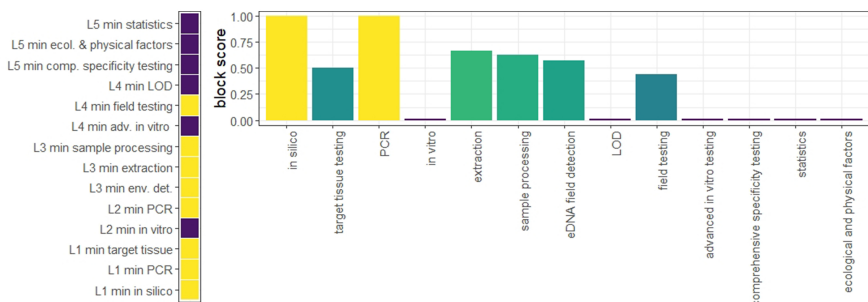

**Level 0:** Assay no. 343 detecting *Daphnia magna*. Assay information was published in paper no. 243 in 2018. Despite some advanced validation, this assay does not fulfill the minimum criterion of “*in silico* testing” and “target tissue testing”. Therefore, it could not be classed as Level 1 on the validation scale.

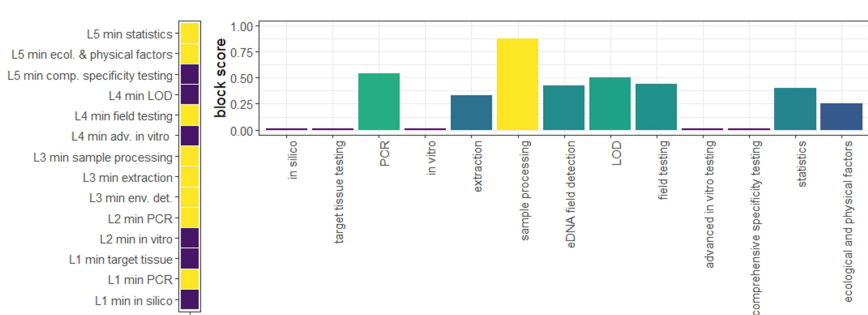

Source: https://www.biorxiv.org/content/10.1101/2020.04.27.063990v3.full.pdf
