# 1 **A validation scale to determine the readiness of** 2 **environmental DNA assays for routine species monitoring**

3 Running title: eDNA assay validation scale

4  
5 **Bettina Thalinger<sup>1,2,3\*</sup>, Kristy Deiner<sup>4,5</sup>, Lynsey R. Harper<sup>6,7</sup>, Helen C. Rees<sup>8</sup>, Rosetta C.**  
6 **Blackman<sup>9,10</sup>, Daniela Sint<sup>3,11</sup>, Michael Traugott<sup>3,11</sup>, Caren S. Goldberg<sup>12</sup> & Kat Bruce<sup>13</sup>**

7  
8 <sup>1</sup> Centre for Biodiversity Genomics, University of Guelph, 50 Stone Road E, N1G 2W1, Guelph,  
9 Ontario, Canada

10 <sup>2</sup> Department of Integrative Biology, College of Biological Sciences, University of Guelph, 50  
11 Stone Road E, N1G2W1, Guelph, Ontario, Canada

12 <sup>3</sup> Department of Zoology, University of Innsbruck, Technikerstr. 25, 6020, Innsbruck, Austria

13 <sup>4</sup> Natural History Museum, Cromwell Road, London, SW7 5BD, UK

14 <sup>5</sup> Institute of Biogeochemistry and Pollutant Dynamics, ETH Zurich, Universitätstr. 16, 8092  
15 Zurich, Switzerland

16 <sup>6</sup> Illinois Natural History Survey, Prairie Research Institute, University of Illinois at Urbana-  
17 Champaign, Champaign, IL, USA

18 <sup>7</sup> School of Biological and Environmental Sciences, Liverpool John Moores University, Liverpool,  
19 L3 3AF, UK

20 <sup>8</sup> RSK ADAS Ltd, School of Veterinary Medicine and Science, The University of Nottingham,  
21 Sutton Bonington Campus, Loughborough, LE12 5RD, UK

22 <sup>9</sup> Eawag: Swiss Federal Institute of Aquatic Science and Technology, Department of Aquatic  
23 Ecology, Überlandstr. 133, 8600 Dübendorf, Switzerland

24 <sup>10</sup> Department of Evolutionary Biology and Environmental Studies, University of Zurich,  
25 Winterthurerstr. 190, CH-8057 Zurich, Switzerland

26 <sup>11</sup> Sinsoma GmbH, Lannes 6, 6176 Völs, Austria

27 <sup>12</sup> School of the Environment, Washington State University, Pullman, WA 99164, USA

28 <sup>13</sup> Nature Metrics Ltd, CABI Site, Bakeham Lane, Egham, TW20 9TY, UK

29

30 **\*Corresponding author:**

31 Bettina Thalinger, [bettina.thalinger@gmail.com](mailto:bettina.thalinger@gmail.com)

32 Centre for Biodiversity Genomics, University of Guelph, 50 Stone Road E, N1G 2W1, Guelph,  
33 Ontario, Canada; phone: +1 519-824-4120 Ext. 53800

34

35 **Key words:** digital PCR, eDNA, endpoint PCR, <https://edna-validation.com>, quantitative PCR,  
36 species-specific, species detection

37

38

39 **Abstract**

40

41 The use of environmental DNA (eDNA) analysis for species monitoring requires rigorous validation -  
42 from field sampling to the analysis of PCR-based results - for meaningful application and  
43 interpretation. Assays targeting eDNA released by individual species are typically validated with no  
44 predefined criteria to answer specific research questions in one ecosystem. Hence, the general  
45 applicability of assays as well as associated uncertainties and limitations, often remain  
46 undetermined. The absence of clear guidelines for assay validation prevents targeted eDNA assays  
47 from being incorporated into species monitoring and policy; thus, their establishment is essential for  
48 realizing the potential of eDNA-based surveys. We describe the measures and tests necessary for  
49 successful validation of targeted eDNA assays and the associated pitfalls to form the basis of  
50 guidelines. A list of 122 variables was compiled, consolidated into 14 thematic blocks, (e.g. “*in silico*  
51 analysis”), and arranged on a 5-level validation scale from “incomplete” to “operational” with defined  
52 minimum validation criteria for each level. These variables were evaluated for 546 published single-  
53 species assays. The resulting dataset was used to provide an overview of current validation  
54 practices and test the applicability of the validation scale for future assay rating. Of the 122  
55 variables, 20% to 76% were reported; the majority (30%) of investigated assays were classified as  
56 Level 1 (incomplete), and 15% did not achieve this first level. These assays were characterised by  
57 minimal *in silico* and *in vitro* testing, but their share in annually published eDNA assays has declined  
58 since 2014. The meta-analysis demonstrates the suitability of the 5-level validation scale for  
59 assessing targeted eDNA assays. It is a user-friendly tool to evaluate previously published assays  
60 for future research and routine monitoring, while also enabling the appropriate interpretation of  
61 results. Finally, it provides guidance on validation and reporting standards for newly developed  
62 assays.

63

64 **Key words:** digital PCR, eDNA, endpoint PCR, <https://edna-validation.com/>, quantitative PCR,  
65 species-specific, species detection

66

67

## 68 **1. Introduction**

69

70 Determining the occurrence of species is essential for ecology and requires sensitive and  
71 accurate detection methods. Within the last decade, species detection from environmental DNA  
72 (eDNA; i.e. detection of extra-organismal DNA released by organisms into their environment)  
73 has shown great potential for routine species surveys (Rees, Maddison, Middleditch, Patmore,  
74 & Gough, 2014; Goldberg et al., 2016; Deiner et al., 2017; Langlois, Allison, Bergman, To, &  
75 Helbing, 2020; Sepulveda, Nelson, Jerde, & Luikart, 2020). The interest in molecular species  
76 detection has fuelled the development of over 500 assays, reviewed herein, that utilise PCR to  
77 amplify DNA or RNA extracted from environmental samples. Generally, “targeted” eDNA assays  
78 must be specific to the species of interest and possess high sensitivity to allow detection at low  
79 densities, low DNA concentrations, and across spatiotemporal scales (Goldberg et al., 2016;  
80 MacDonald & Sarre, 2017).

81 A targeted eDNA assay encompasses the entire workflow used to detect a species’ DNA  
82 from an environmental sample, inclusive of field sampling through to the interpretation of PCR-  
83 based results; it does not just consist of the primers and probes. Thus, adherence to workflows  
84 will determine the success or failure of an eDNA assay because methodological choices  
85 influence performance and sensitivity (e.g. Doi, Takahara, et al., 2015; Tsuji, Takahara, Doi,  
86 Shibata, & Yamanaka, 2019). In practice, assays are often validated within a specific system to  
87 answer a set question about the target species. Hence, applications beyond this initial  
88 development are hampered by the poor understanding of remaining uncertainties, such as the  
89 potential for false positives resulting from non-target amplification or contamination, or false  
90 negatives resulting from low sensitivity, sample degradation, low DNA yield protocols or  
91 inhibition (Goldberg et al., 2016; Lacoursière-Roussel & Deiner, 2019). In a management

92 context, false positives and false negatives may lead to misuse of resources (e.g. funds and  
93 personnel) for issues such as rare species protection and invasive species control. Both  
94 scenarios foster inaccurate interpretation of results, fuelling arguments against the routine use  
95 of eDNA detection for species monitoring (Jerde, 2019).

96       Aside from a few well-validated eDNA assays already incorporated into routine monitoring,  
97 the application of published assays is a minefield for end-users to navigate. We illustrate this  
98 through two examples. The assay for great crested newt (*Triturus cristatus* (Laurenti, 1768), a  
99 legally protected species in the UK [Natural England, 2015]) was one of the first eDNA assays  
100 validated in both laboratory and field trials against conventional tools, demonstrating its potential  
101 for routine monitoring (Thomsen et al., 2012; Rees, Bishop, et al., 2014). After successful  
102 validation, a national eDNA-based citizen science monitoring scheme was tested and showed  
103 that large-scale eDNA sampling can enable distribution modelling (Biggs et al., 2015). These  
104 initial studies paved the way for eDNA-based *T. cristatus* detection to inform new policies aimed  
105 at providing landscape-level species protection (L. R. Harper, Buxton, et al., 2019). Studies  
106 have since investigated optimal methods of eDNA capture, relative abundance and detection  
107 probability estimation, and the influence of seasonality as well as biotic and abiotic factors on  
108 *T. cristatus* eDNA detection and quantification (Buxton, Groombridge, & Griffiths, 2017; Buxton,  
109 Groombridge, Zakaria, & Griffiths, 2017; Buxton, Groombridge, & Griffiths, 2018a, 2018b). Due  
110 to these combined efforts, the assay has undergone exemplary validation and has been  
111 operational for management since 2014.

112       Conversely, no assays have been successfully applied to routine monitoring of invasive  
113 American crayfish. For example, there is a lack of consensus on a single assay for the signal  
114 crayfish (*Pacifastacus leniusculus* (Dana, 1852)). Larson et al. (2017) developed and tested an  
115 assay against conventional trapping, but five other assays have also been proposed with  
116 differing degrees of validation and divergent *in silico* and *in vitro* approaches (Agersnap et al.,  
117 2017; Dunn, Priestley, Herraiz, Arnold, & Savolainen, 2017; K. J. Harper, Anucha, Turnbull,

118 Bean, & Leaver, 2018; Mauvisseau et al., 2018; Robinson, Uren Webster, Cable, James, &  
119 Consuegra, 2018). The *P. leniusculus* assays were developed using a variety of strategies for  
120 eDNA sampling, capture, extraction, qPCR of different genetic markers, and applied across  
121 genetically diverse populations within the species range. Due to this substantial methodological  
122 variability, direct comparisons between results obtained from these assays are impossible.  
123 Therefore, the *P. leniusculus* assays represent a minefield for end-users, despite the need for  
124 accurate and sensitive tools to enable actionable species management of this invasive species  
125 in Europe, Japan, and California (USA).

126 These case studies exemplify how consensus and dissent in assay validation can influence  
127 the implementation of eDNA analysis for species monitoring. Developing guidelines to  
128 determine the suitability of eDNA assays for end-users will therefore ensure that ecological  
129 insights or management decisions are based on robust molecular analyses with quantifiable  
130 uncertainties and clear inference limits (Goldberg et al., 2016; MacDonald & Sarre, 2017;  
131 Nicholson et al., 2020; Sepulveda et al., 2020). Here, we describe the general validation  
132 process for targeted PCR-based methods and examine the extent of assay validation and  
133 reporting in the eDNA literature. We present an eDNA assay validation scale, which establishes  
134 criteria to enable the classification of assays based on their accuracy and sensitivity for single-  
135 species detection. To demonstrate the utility of the scale, we performed a meta-analysis of  
136 targeted eDNA assays published in 327 papers as of 11 April 2019 (546 assays). By placing an  
137 eDNA assay on the validation scale, end-users can determine the recommended scenarios for  
138 application and improve assay performance with further validation.

139

140

## 141 **2. Criteria and principles of validation**

142

### 143 *2.1. General requirements for an eDNA laboratory*

144

145 All laboratory activities are subject to error. In order to have confidence in results, quality  
146 standards and good practices are required in diagnostic laboratory environments (e.g. World  
147 Health Organization, 2011; Halling, Schrijver, & Persons, 2012). Although few eDNA-processing  
148 laboratories will employ 'ancient DNA' practices (e.g. full body suit and positive air pressure with  
149 HEPA filtered inflow), all laboratories conducting eDNA analysis should utilise a unidirectional  
150 workflow where pre-PCR steps are performed in separate laboratories dedicated to low DNA  
151 quality and quantity (Goldberg et al., 2016). Completely standardised laboratory environments  
152 are rare and the use of proficiency tests (as conducted by UK laboratories participating in  
153 *T. cristatus* monitoring) can help end-users understand the quality of results obtained among  
154 different laboratories. Even results obtained from an extensively validated assay can be  
155 questionable when they are not produced within a suitable laboratory environment (Goldberg et  
156 al., 2016).

157

## 158 2.2. Reporting standards for *in silico*, *in vitro* and *in situ* validation of assays

159

160 Targeted eDNA assay validation is a multi-step process. It can be divided into *in silico* validation  
161 (i.e. computer-based tests for primer specificity), *in vitro* validation (i.e. laboratory tests with  
162 reference tissue samples) and *in situ* validation (i.e. field tests with eDNA samples) (see  
163 Goldberg et al., 2016; MacDonald & Sarre, 2017; Langlois et al., 2020; So, Fong, Lam, &  
164 Dudgeon, 2020). Understanding the utility of an assay requires both knowledge of the context in  
165 which it has been designed, and a broader understanding of how it was developed. Here, we  
166 give a brief overview of what key steps comprise assay validation, with a focus on  
167 troubleshooting steps that may be necessary when applying previously published assays to new  
168 locations or with modified laboratory practices (Table 1).

169           The first step is *in silico* assay validation, the goal of which is to determine assay  
170 specificity based on known sequence diversity. Sequence diversity has three categories,  
171 including sequences from: (i) closely related and co-occurring species, (ii) closely related but  
172 geographically distinct species, and (iii) distantly related but co-occurring species (i.e.  
173 sequences that could co-amplify and produce false positive results for a target species). By  
174 checking primer specificity from available sequences, the geographic area of applicability for an  
175 assay can be maximised through identifying and removing potential issues of co-amplification.  
176 Typically, public or custom databases are used for performing *in silico* amplification (e.g.  
177 ecoPCR [Boyer et al., 2016]; primerBlast [Ye et al., 2012]; PrimerTREE [Cannon et al., 2016];  
178 PrimerMiner [Elbrecht & Leese, 2017]). While reference sequence libraries are often far from  
179 complete and many of the factors influencing successful PCR amplification cannot be simulated,  
180 *in silico* testing provides a first impression of primer performance and should be conducted.

181           The essential components of *in vitro* assay validation are optimisation, specificity, and  
182 sensitivity. Tests with varying PCR chemistry, reaction volume, primer/probe concentration,  
183 cycling conditions and technical replication will ensure optimal, standardised and error-free  
184 target DNA amplification (Bustin et al., 2009; Wilcox, Carim, McKelvey, Young, & Schwartz,  
185 2015; Goldberg et al., 2016). The assay must then be tested against closely related and co-  
186 occurring non-target taxa to ensure specificity, which is not automatically guaranteed after  
187 successful *in silico* testing (Goldberg et al., 2016; So et al., 2020). Ideally, tissue-derived DNA  
188 samples from multiple individuals spanning a defined geographic area are tested to ensure the  
189 assay is robust to genetic variants of target and non-target species. Amplicons should be  
190 Sanger sequenced to confirm species identity (Goldberg et al., 2016), although short fragments  
191 (<100 bp) have limited sequence length available for species determination (Meusnier et al.,  
192 2008). Next, the Limit of Detection (LOD) must be determined to assess assay sensitivity, and  
193 the Limit of Quantification (LOQ) determined, if the measurement of eDNA quantity is desired.  
194 Generally, these values are obtained using a dilution series of quantified DNA amplicons or



195 synthesized gene fragments (e.g. IDT gBlocks™ Gene Fragment) based on public or *de novo*  
196 reference sequences (Langlois et al., 2020). The LOD and LOQ have various definitions in the  
197 eDNA literature, but were recently standardised by Klymus et al. (2019), where LOD is the  
198 lowest standard concentration at which 95% of technical replicates amplify and LOQ is the  
199 lowest standard concentration for which the coefficient of variation (CV) value is <35%.  
200 Unfortunately, the existence of past definitions requires the final LOD and LOQ to be reported  
201 as well as the definition used. We note that these metrics apply directly to the assay as  
202 developed and assume no interference during PCR from the rest of the species' genome (i.e. if  
203 a gBlock is used), other genetic material, or inhibitory compounds.

204 Finally, the assay must be validated *in situ* by surveying sites with and without the target  
205 species (Goldberg et al., 2016). It must be tested against conventional tools for  
206 presence/absence detection and tests for estimation of relative abundance/biomass are  
207 advisable. Assays are deemed successful if eDNA and conventional detections concur at  
208 occupied sites and no eDNA detections are observed at definitively unoccupied sites. Sanger  
209 sequencing of eDNA amplicons can provide additional evidence but cannot distinguish sample  
210 contamination from true detections (Goldberg et al., 2016). Besides screening for the target  
211 species, negative eDNA samples (or all eDNA samples if quantification is necessary) should be  
212 tested for inhibition. This requires an Internal Positive Control (IPC) assay for synthetic DNA  
213 (e.g. ThermoFisher) or an assay for non-target species using exogenous or endogenous DNA  
214 (Goldberg et al., 2016; Veldhoen et al., 2016; Doi et al., 2017; Furlan & Gleeson, 2017).

215 Advanced *in situ* validation may investigate the influence of biotic (e.g. abundance, biomass,  
216 life stages, microbial activity) and abiotic (e.g. temperature, pH, ultraviolet light, salinity) factors  
217 influencing eDNA origin, state, fate, and transport (Barnes & Turner, 2016; Lacoursière-Roussel  
218 & Deiner, 2019; Wang et al., 2021). Assays that account for spatial (e.g. shoreline versus  
219 offshore) and temporal (e.g. summer versus winter) variation in eDNA distribution and  
220 abundance due to the ecology of a species can be implemented with greater confidence (de

221 Souza, Godwin, Renshaw, & Larson, 2016; Lawson Handley et al., 2019). Occupancy modelling  
222 using eDNA data is desirable as it accounts for detection probability while estimating site  
223 occupancy, even if all field samples from a site return negative. Hierarchical models that  
224 incorporate eDNA occupancy and detection probabilities at site, sample, and technical replicate  
225 levels are most accurate and can be implemented in software such as R (e.g. package  
226 “eDNAoccupancy” [Dorazio & Erickson, 2018]) or PRESENCE (MacKenzie et al., 2002).  
227 However, model assumptions regarding false positives should be carefully considered.

228

### 229 **3. Types and trade-offs of targeted eDNA detection methods**

230

231 Amid the processing chain (i.e. sampling to data analysis) for a targeted eDNA assay, PCR  
232 warrants extra consideration as the technological spectrum and potential for variation is  
233 enormous. Previous publications have typically defined an assay as the primers (and probe)  
234 required for DNA amplification and associated visualisation (e.g. agarose gel electrophoresis,  
235 qPCR instrumentation). However, differences between the multiple detection instruments and  
236 chemistry used in combination with species-specific primer (and probe) sets can fundamentally  
237 change the sensitivity and specificity of targeted eDNA assays. Table 2 provides an overview of  
238 amplification types and their associated trade-offs.

239 Many assays - especially those published in earlier years - use endpoint PCR. However,  
240 most assays to date employ real-time quantitative (q)PCR allowing for greater sensitivity and  
241 quantitative data. More recent publications have used digital (d)PCR for absolute quantification.  
242 Alternatively, LAMP and CRISPR have been shown to be suitable for eDNA applications,  
243 decreasing the requirements of in-field testing equipment (M. R. Williams et al., 2017; M. A.  
244 Williams et al., 2019). A few publications use alternative methods such as PCR combined with  
245 restriction fragment length polymorphism (RFLP). All amplification types (Table 2) enable  
246 distribution and occupancy modelling, provided enough biological and technical replication is

247 employed (Hunter et al., 2015; Goldberg, Strickler, & Fremier, 2018; Wilcox et al., 2018).  
248 However, endpoint PCR in combination with agarose gels is the only type where a detection  
249 limit cannot be set objectively (low sensitivity) and which does not provide estimates of DNA  
250 copy number (Doi, Uchii, et al., 2015; Yamanaka & Minamoto, 2016; Hunter et al., 2017;  
251 Thalinger, Wolf, Traugott, & Wanzenböck, 2019). Depending on the management context and  
252 study size, the optimal detection instrument can vary, albeit technological advances and  
253 required accuracy will continue to shift the focus away from endpoint PCR.

254

#### 255 **4. Evaluating the current status of assay validation**

256

257 To understand current validation practices for targeted eDNA assays, we generated an  
258 extensive list of variables deemed important for assay validation by 35 experts in the field of  
259 targeted eDNA detection whom convened at a DNAqua-Net EU COST Action (Leese et al.,  
260 2016) workshop held on 26-27 March 2018 at the University of Innsbruck, Austria. The variables  
261 in this list consist of 18 categorical variables (e.g. species identity, target gene, sample type)  
262 and 104 binomial variables directly associated with the eDNA processing chain, from primer  
263 design to interpretation of field study results (SI1).

264 A comprehensive literature database for targeted eDNA assays was built in three steps.  
265 First, we included all papers listed on the 'eDNA assays' web page  
266 (<https://labs.wsu.edu/edna/edna-assays/>) as of 10 April 2019. Second, we conducted a Web of  
267 Science literature search on 11 April 2019, including the search terms "environmental DNA" and  
268 "eDNA" but excluding terms associated with microbial organisms and metabarcoding (SI2A).  
269 Third, the resulting 660 Web of Science entries were manually checked for suitability (i.e.  
270 macrobial target organism, targeted eDNA detection intended) leading to a combined database  
271 of 327 papers. For each of the assays contained in these papers, the 122 variables were  
272 recorded in a checklist by one of the authors. Before data entry, all authors validated the same

273 four papers (Deiner & Altermatt, 2014; Rees, Bishop, et al., 2014; Thalinger et al., 2016; L. R.  
274 Harper, Griffiths, et al., 2019) to ensure recorder standardisation. Validation efforts were  
275 classified as 1 for “tests done, or parameter reported”, 0 for “variable not reported, or no testing  
276 done”, and NA in cases where the respective variable did not match the assay type (e.g. filter  
277 type when samples were precipitated). When an assay was used in multiple papers, all  
278 validation efforts were summarised in one entry and the literature database was extended with  
279 the papers reporting primer sequences or other methodological aspects. As the type of  
280 amplification is important for assay validation, primer pairs used on multiple detection platforms  
281 were given separate database entries per amplification type. However, because most assays  
282 developed were presented in one publication, we did not account for slight variations in other  
283 aspects of the workflow (e.g. different extraction method, different filter type). After recording the  
284 values for each eDNA assay using the validation checklist (SI1), each author scored the assay  
285 intuitively based on a preliminary version of the validation scale (see section 5). The resulting  
286 database of 122 variables for each assay was the basis for all further analyses using R (R Core  
287 Team, 2020) and associated packages (SI2B).

288 Altogether, 546 assays from 327 papers were assessed. Of these assays, 227 were  
289 designed to detect fish species and 74 were designed to detect amphibian species; hence, it is  
290 unsurprising that ~80% of assays utilised water sampling. Fourteen percent of the assays were  
291 tested on tissue only and few assays were optimised for other sample types such as aerosol,  
292 sediment, snow or soil. More than 80% of assays were reported in only one paper, and most  
293 were designed for qPCR (~60%) or endpoint PCR (~35%) platforms. The cytochrome c oxidase  
294 subunit I (*COI*) gene was the most popular (>40%) genetic marker, followed by the cytochrome  
295 b (*cytb*) gene (~23%) (SI3).

296

297

298 **5. The 5-level assay validation scheme**

299

300 To enable standardised assay validation and reporting in the future, we assigned the assay-  
301 specific variables to 14 thematic blocks such as “*in silico* analysis”, “PCR”, or “extensive field  
302 testing of environmental samples” (Table 3, Fig. 1). Each of the variable blocks contains  
303 between three and 26 variables (SI1). Some of the variable blocks summarize basic practices  
304 (e.g. “*in silico* analysis”) while others describe advanced assay validation (e.g. “detection  
305 probability estimation from statistical modelling”). To simplify the reporting of an assay’s  
306 validation level in the future, the blocks were placed on a five-level scale enabling the  
307 categorisation of assays from Level 1 (incomplete) to Level 5 (operational), and the  
308 interpretation of associated field study results (Fig. 1). The scale is additive, which means for an  
309 assay to be placed at Level 3, it must fulfil the reporting requirements of Levels 1, 2, and 3.  
310 Level 1 (incomplete) summarizes assays for which basic *in silico* analysis, target tissue testing  
311 and general information regarding PCR were reported. Level 2 (partial) – assays were  
312 characterized by comprehensive reporting of PCR conditions and *in vitro* testing on closely  
313 related non-target species. For assays placed at Level 3 (essential), the target organism was  
314 successfully detected from an environmental sample and the specifics of DNA extraction and  
315 concentration of eDNA from the environmental sample (i.e. filtration, precipitation) were  
316 reported. The LOD, extensive field testing and *in vitro* testing on co-occurring non-target species  
317 were the variable blocks specifically associated with Level 4 (substantial). At Level 5  
318 (operational), the assay has been subjected to comprehensive specificity testing, detection  
319 probability estimates from statistical modelling and investigations of ecological and physical  
320 factors potentially influencing eDNA in the environment (Table 3, Fig. 1).

321 The placement of assays on this 5-level scale is not straightforward, since each of the 14  
322 variable blocks contains variables associated with either rudimentary or substantial validation  
323 and reporting. For instance, the thematic block “concentration of eDNA from environmental  
324 sample” contains the variable “volume/weight of environmental sample”, which was reported for

325 almost all assays, but also contains “pressure used for filtration”, which was rarely reported  
326 and/or measured. Therefore, a minimum criterion was introduced for each variable block  
327 functioning as proof of validation and ensuring standardized placement of assays on the  
328 validation scale. For example, “detection from an environmental sample” was used as evidence  
329 that some validation had been undertaken in the block “detection obtained from environmental  
330 samples” (Table 3). To reach a level on the validation scale, an assay must fulfil all minimum  
331 reporting criteria for that level and any preceding levels.

332 Based on this classification, the results (detected vs. not detected) obtained from eDNA  
333 assays become directly interpretable: when Level 1 or Level 2 assays are applied to  
334 environmental samples without any further validation steps, it is impossible to tell whether the  
335 target species is present or absent independent of the PCR result. Amplifications with a Level 3  
336 assay can be interpreted as “target is likely present”; however, non-amplifications are  
337 inconclusive. When Level 4 and Level 5 assays do not lead to amplification, the target is likely  
338 absent. Positive PCR results at Level 4 and 5 mean that the target species is almost certainly  
339 present (Fig. 1).

340 For a quantitative analysis of reporting practices, we calculated a total scoring percentage  
341 and a block scoring percentage for each assay. The total scoring percentage was defined as the  
342 proportion of the 104 binary variables which were reported. For each of the 14 blocks, the block  
343 scoring percentage was calculated by dividing the number of variables tested/reported by the  
344 complete set of variables associated with the block. Both calculations included only variables  
345 relevant to the applied methods (e.g. for assays using filtration, precipitation variables were  
346 omitted; see Box 1 for example assays).

347 Of the 546 assays analysed, the majority (30%) were classed as Level 1. Of the remainder,  
348 15% ( $N = 83$ ) did not fulfil the minimum criteria necessary to reach Level 1, and no assay  
349 reached Level 5 (Fig. 1 and Fig. 2A). Newer assays published after 2016 were more likely to  
350 reach Level 4, and the percentage of assays failing to reach Level 1 gradually declined since

351 2014 (Fig. 2B). Generally, the total scoring percentage for all variables in a level increased from  
352 Level 0 to Level 4, but its variation was non-uniform with most outliers observed at Level 2  
353 (Fig. 2C). Assays not reaching Level 1 exhibited scoring percentages between ~20% and ~55%,  
354 clearly showing the difference between incomplete and partially validated assays, which did not  
355 achieve higher levels due to one or several missing validation step(s). Generally, variables  
356 associated with lower levels on the validation scale were more likely to be reported or tested.  
357 Nevertheless, some variables (e.g. “haplotypes of target tissue” or “pressure used for filtration”),  
358 were addressed by fewer than 10% of assays (Fig. 2D).

359 The rigour of the minimum criteria was evaluated by tallying the not achieved/reported  
360 cases. Specifically, 62 assays did not reach Level 1 because the targeted species sequence(s)  
361 used in primer design were not reported, which is a prerequisite for this level. Eight assays did  
362 not report the primer sequence. The lack of target detection from an environmental sample and  
363 omission of filter type or precipitation chemicals were the most restrictive criteria and were not  
364 fulfilled by 80 and 43 assays respectively, most of which were exclusively used for tissue tests  
365 (Fig. 2E). For assays ranked at Levels 2 and 3, there was agreement between the intuitive  
366 assay rating provided by the recorder and that assigned by the objective criteria. For assays  
367 placed at Level 1 following objective criteria, authors tended to be more liberal and rated them  
368 one or two levels higher (SI4). Finally, a classification tree analysis (De’Ath & Fabricius, 2000)  
369 was carried out to identify common characteristics of assays placed at each level of the  
370 validation scale (SI5). Most assays failing to reach Level 1 showed distinctly low levels of *in*  
371 *silico* validation. This was also true for most Level 1 assays ( $N = 103$ ), albeit these showed  
372 higher levels of target tissue validation (Fig. 3). On the other end of the spectrum, Level 4  
373 assays were characterised by substantial testing or reporting for *in vitro* testing, field sample  
374 processing, LOD determination, PCR, and field testing.

375

376

## 377 **6. Conclusions and outlook**

378

379 The validation scale and reporting standards developed here are an inclusive set of guidelines  
380 for targeted eDNA assays. They can facilitate communication between the scientific community,  
381 commercial providers and government agencies, and provide guidelines regarding the  
382 application of previously published assays or the development and publication of new assays  
383 (Sepulveda et al., 2020). One needs to acknowledge that a strict standardisation of eDNA  
384 assays will not be possible due to applications for manifold taxa in diverse ecosystems  
385 combined with technological advances. By checking which of the 122 validation variables have  
386 been addressed, it is possible to identify both available and missing information needed to  
387 successfully develop or reuse an assay. The level of validation required for successful routine  
388 species monitoring will also differ on a case-by-case basis. For example, the *T. cristatus* assay  
389 was not placed on Level 5 of the validation scale (in part due to lack of reporting) but was still  
390 approved as an official survey method in the UK. As a general recommendation, authors should  
391 report as much information as possible on the conducted validation steps, either in the main text  
392 or in the supplementary material. Additionally, developers should consult existing guidelines for  
393 best practices along the validation workflow prior to assay design and fieldwork (Bustin et al.,  
394 2009; Goldberg et al., 2016; MacDonald & Sarre, 2017; Klymus et al., 2019). To make the  
395 validation process accessible, we provide a checklist in SI1. Furthermore, a website  
396 (<https://edna-validation.com/>) was created to summarise the cornerstones of the validation  
397 process and the validation scale. This website will function as a curated repository for newly  
398 developed assays and authors are encouraged to enter all 122 variables and the minimum  
399 criteria to rank assays and calculate their scoring percentages on the validation scale. The  
400 website will also serve as a living document when improvements in technology and/or our  
401 understanding of eDNA in the environment advance.



402 The 5-level validation scale designed here provides an overview of the capabilities and  
403 uncertainties of targeted eDNA assays. However, the binary data entry system cannot replace a  
404 close check of previous publications as it does not always allow a qualitative assessment.  
405 Details for validation variables are often spread across different sections in a publication or  
406 ambiguously displayed. Thus, the checklist can be used as standard reporting guidelines for  
407 targeted eDNA assays. It should be emphasised that for specific research questions and  
408 associated publications, minimal validation efforts may be sufficient. Nevertheless, thorough  
409 validation is needed to reduce uncertainties and overcome the limitations associated with  
410 eDNA-based species monitoring. Furthermore, it is important that practitioners consider how an  
411 assay can be modified (e.g. using different PCR reagents) and whether this changes its  
412 validation level.

413 The successful application of targeted eDNA assays for routine species detection and  
414 monitoring largely depends on the scientific community and the industry providing eDNA  
415 services. Laboratories participating in ring tests such as that proposed for metabarcoding  
416 (Blackman et al., 2019) can facilitate consensus on analysis standards. For now, assay  
417 developers must respond to queries and help troubleshoot reproducibility issues. Such  
418 engagement will facilitate the application of targeted eDNA assays by other users and outside  
419 their original geographic scope or academic context. Finally, it is necessary for both the  
420 scientific community and the commercial laboratories to communicate realistic applications and  
421 limitations to end-users, as often an assay is not bad *per se*, but simply unsuitable.

422

423

#### 424 **Data availability**

425 The literature database, the validation checklist compiled from it, the R code, and seven  
426 datasets derived from the checklist and used for analyses are available on Figshare at

427 <https://doi.org/10.6084/m9.figshare.12184860.v1> The literature database, the validation scale,  
428 and the full checklist are also available at <https://edna-validation.com/>.

429

### 430 **Acknowledgements**

431 This article is based upon work from COST Action DNAqua-Net (CA15219), supported by the  
432 COST (European Cooperation in Science and Technology) programme, and RCB was also  
433 funded by SNF grant nr. 31003A\_173074. We thank the workshop participants who convened  
434 on 26-27 March 2018 at the University of Innsbruck, Austria, where initial brainstorming for this  
435 manuscript occurred. We acknowledge additional guidance and input from Micaela Hellström,  
436 and are grateful to Cathryn Abbott for the improved design of Fig.1. We thank Nature Metrics  
437 Ltd. for support in hosting the independent website formed to operationalise the validation scale  
438 for future use.

439

### 440 **Conflict of interest**

441 KB is the co-founder and CEO of Nature Metrics Ltd., a for profit company dedicated to the  
442 analysis of environmental DNA. HCR manages environmental DNA services for RSK ADAS  
443 Ltd., a for profit environmental consultancy. DS and MT are co-founders of Sinsoma GmbH., a  
444 for profit company dedicated to the analysis of environmental DNA.

445

### 446 **Author's contributions**

447 KB conceived the original idea, which was developed by all co-authors. BT compiled the  
448 literature database and BT, KD, LRH, HCR, RCB, DS, MT, and KB collected the data. BT  
449 analysed the data and led the writing of the manuscript for which first drafts of sections were  
450 provided by LH, RCB and KD. All authors contributed critically to the drafts and gave final  
451 approval for publication.



453 **References**

- 454
- 455 Agersnap, S., Larsen, W. B., Knudsen, S. W., Strand, D., Thomsen, P. F., Hesselsøe, M., ...
- 456 Møller, P. R. (2017). Monitoring of noble, signal and narrow-clawed crayfish using
- 457 environmental DNA from freshwater samples. *PLOS ONE*, *12*(6), e0179261.
- 458 doi:10.1371/journal.pone.0179261
- 459 Barnes, M. A., & Turner, C. R. (2016). The ecology of environmental DNA and implications for
- 460 conservation genetics. *Conservation Genetics*. Springer Netherlands. doi:10.1007/s10592-
- 461 015-0775-4
- 462 Biggs, J., Ewald, N., Valentini, A., Gaboriaud, C., Dejean, T., Griffiths, R. A., ... Dunn, F. (2015).
- 463 Using eDNA to develop a national citizen science-based monitoring programme for the
- 464 great crested newt (*Triturus cristatus*). *Biological Conservation*, *183*, 19–28.
- 465 doi:10.1016/j.biocon.2014.11.029
- 466 Blackman, R., Mächler, E., Altermatt, F., Arnold, A., Beja, P., Boets, P., ... Deiner, K. (2019).
- 467 Advancing the use of molecular methods for routine freshwater macroinvertebrate
- 468 biomonitoring – the need for calibration experiments. *Metabarcoding and Metagenomics*, *3*,
- 469 e34735. doi:10.3897/mbmg.3.34735
- 470 Boyer, F., Mercier, C., Bonin, A., Le Bras, Y., Taberlet, P., & Coissac, E. (2016). obitools: A
- 471 unix-inspired software package for DNA metabarcoding. *Molecular Ecology Resources*,
- 472 *16*(1), 176–182. doi:10.1111/1755-0998.12428
- 473 Bustin, S. A., Benes, V., Garson, J. A., Hellemans, J., Huggett, J., Kubista, M., ... Wittwer, C. T.
- 474 (2009). The MIQE guidelines: Minimum information for publication of quantitative real-time
- 475 PCR experiments. *Clinical Chemistry*, *55*(4), 611–622. doi:10.1373/clinchem.2008.112797
- 476 Buxton, A. S., Groombridge, J., & Griffiths, R. (2018a). Comparison of Two Citizen Scientist
- 477 Methods for Collecting Pond Water Samples for Environmental DNA Studies. *Citizen*
- 478 *Science: Theory and Practice*, *3*(2). doi:10.5334/cstp.151

- 479 Buxton, A. S., Groombridge, J. J., & Griffiths, R. A. (2017). Is the detection of aquatic  
480 environmental DNA influenced by substrate type? *PLOS ONE*, *12*(8), e0183371.  
481 doi:10.1371/journal.pone.0183371
- 482 Buxton, A. S., Groombridge, J. J., & Griffiths, R. A. (2018b). Seasonal variation in environmental  
483 DNA detection in sediment and water samples. *PLOS ONE*, *13*(1).  
484 doi:10.1371/journal.pone.0191737
- 485 Buxton, A. S., Groombridge, J. J., Zakaria, N. B., & Griffiths, R. A. (2017, April 10). Seasonal  
486 variation in environmental DNA in relation to population size and environmental factors.  
487 *Scientific Reports*. Nature Publishing Group. doi:10.1038/srep46294
- 488 Cannon, M. V., Hester, J., Shalkhauser, A., Chan, E. R., Logue, K., Small, S. T., & Serre, D.  
489 (2016). In silico assessment of primers for eDNA studies using PrimerTree and application  
490 to characterize the biodiversity surrounding the Cuyahoga River. *Scientific Reports*, *6*.  
491 doi:10.1038/srep22908
- 492 De'Ath, G., & Fabricius, K. E. (2000). Classification and regression trees: A powerful yet simple  
493 technique for ecological data analysis. *Ecology*, *81*(11), 3178–3192. doi:10.1890/0012-  
494 9658(2000)081[3178:CARTAP]2.0.CO;2
- 495 de Souza, L. S., Godwin, J. C., Renshaw, M. A., & Larson, E. (2016). Environmental DNA  
496 (eDNA) detection probability is influenced by seasonal activity of organisms. *PLOS ONE*,  
497 *11*(10), e0165273. doi:10.1371/journal.pone.0165273
- 498 Deiner, K., & Altermatt, F. (2014). Transport distance of invertebrate environmental DNA in a  
499 natural river. *PLOS ONE*, *9*(2). doi:10.1371/journal.pone.0088786
- 500 Deiner, K., Bik, H. M., Mächler, E., Seymour, M., Lacoursière-Roussel, A., Altermatt, F., ...  
501 Bernatchez, L. (2017). Environmental DNA metabarcoding: Transforming how we survey  
502 animal and plant communities. *Molecular Ecology*, *26*(21), 5872–5895.  
503 doi:10.1111/mec.14350
- 504 Doi, H., Katano, I., Sakata, Y., Souma, R., Kosuge, T., Nagano, M., ... Tojo, K. (2017).

- 505           Detection of an endangered aquatic heteropteran using environmental DNA in a wetland  
506           ecosystem. *Royal Society Open Science*, 4(7). doi:10.1098/rsos.170568
- 507   Doi, H., Takahara, T., Minamoto, T., Matsuhashi, S., Uchii, K., & Yamanaka, H. (2015). Droplet  
508           digital polymerase chain reaction (PCR) outperforms real-time PCR in the detection of  
509           environmental DNA from an invasive fish species. *Environmental Science and Technology*,  
510           49(9), 5601–5608. doi:10.1021/acs.est.5b00253
- 511   Doi, H., Uchii, K., Takahara, T., Matsuhashi, S., Yamanaka, H., & Minamoto, T. (2015). Use of  
512           droplet digital PCR for estimation of fish abundance and biomass in environmental DNA  
513           surveys. *PLOS ONE*, 10(3), 1–11. doi:10.1371/journal.pone.0122763
- 514   Dorazio, R. M., & Erickson, R. A. (2018). ednaoccupancy: An R package for multiscale  
515           occupancy modelling of environmental DNA data. *Molecular Ecology Resources*, 18(2),  
516           368–380. doi:10.1111/1755-0998.12735
- 517   Dunn, N., Priestley, V., Herraiz, A., Arnold, R., & Savolainen, V. (2017). Behavior and season  
518           affect crayfish detection and density inference using environmental DNA. *Ecology and  
519           Evolution*, 7(19), 7777–7785. doi:10.1002/ece3.3316
- 520   Elbrecht, V., & Leese, F. (2017). PrimerMiner: an R package for development and in silico  
521           validation of DNA metabarcoding primers. *Methods in Ecology and Evolution*, 8(5), 622–  
522           626. doi:10.1111/2041-210X.12687
- 523   Furlan, E. M., & Gleeson, D. (2017). Improving reliability in environmental DNA detection  
524           surveys through enhanced quality control. *Marine and Freshwater Research*, 68(2), 388.  
525           doi:10.1071/MF15349
- 526   Goldberg, C. S., Strickler, K. M., & Fremier, A. K. (2018). Degradation and dispersion limit  
527           environmental DNA detection of rare amphibians in wetlands: Increasing efficacy of  
528           sampling designs. *Science of the Total Environment*, 633, 695–703.  
529           doi:10.1016/j.scitotenv.2018.02.295
- 530   Goldberg, C. S., Turner, C. R., Deiner, K., Klymus, K. E., Thomsen, P. F., Murphy, M. A., ...

- 531 Taberlet, P. (2016). Critical considerations for the application of environmental DNA  
532 methods to detect aquatic species. *Methods in Ecology and Evolution*, 7(11), 1299–1307.  
533 doi:10.1111/2041-210X.12595
- 534 Halling, K. C., Schrijver, I., & Persons, D. L. (2012). Test verification and validation for molecular  
535 diagnostic assays. *Archives of Pathology and Laboratory Medicine*, 136(1), 11–13.  
536 doi:10.5858/arpa.2011-0212-ED
- 537 Harper, K. J., Anucha, N. P., Turnbull, J. F., Bean, C. W., & Leaver, M. J. (2018). Searching for  
538 a signal: Environmental DNA (eDNA) for the detection of invasive signal crayfish,  
539 *Pacifastacus leniusculus* (Dana, 1852). *Management of Biological Invasions*, 9(2), 137–  
540 148. doi:10.3391/mbi.2018.9.2.07
- 541 Harper, L. R., Buxton, A. S., Rees, H. C., Bruce, K., Brys, R., Halfmaerten, D., ... Hänfling, B.  
542 (2019). Prospects and challenges of environmental DNA (eDNA) monitoring in freshwater  
543 ponds. *Hydrobiologia*, 826(1), 25–41. doi:10.1007/s10750-018-3750-5
- 544 Harper, L. R., Griffiths, N. P., Lawson Handley, L., Sayer, C. D., Read, D. S., Harper, K. J., ...  
545 Hänfling, B. (2019). Development and application of environmental DNA surveillance for  
546 the threatened crucian carp ( *Carassius carassius* ). *Freshwater Biology*, 64(1), 93–107.  
547 doi:10.1111/fwb.13197
- 548 Hunter, M. E., Dorazio, R. M., Butterfield, J. S. S., Meigs-Friend, G., Nico, L. G., & Ferrante, J.  
549 A. (2017). Detection limits of quantitative and digital PCR assays and their influence in  
550 presence–absence surveys of environmental DNA. *Molecular Ecology Resources*, 17(2),  
551 221–229. doi:10.1111/1755-0998.12619
- 552 Hunter, M. E., Oyler-McCance, S. J., Dorazio, R. M., Fike, J. A., Smith, B. J., Hunter, C. T., ...  
553 Hart, K. M. (2015). Environmental DNA (eDNA) sampling improves occurrence and  
554 detection estimates of invasive Burmese pythons. *PLOS ONE*, 10(4), e0121655.  
555 doi:10.1371/journal.pone.0121655
- 556 Jerde, C. L. (2019). Can we manage fisheries with the inherent uncertainty from eDNA? *Journal*

557 *of Fish Biology*, jfb.14218. doi:10.1111/jfb.14218

558 Klymus, K. E., Merkes, C. M., Allison, M. J., Goldberg, C. S., Helbing, C. C., Hunter, M. E., ...

559 Richter, C. A. (2019). Reporting the limits of detection and quantification for environmental

560 DNA assays. *Environmental DNA*, edn3.29. doi:10.1002/edn3.29

561 Lacoursière-Roussel, A., & Deiner, K. (2019). Environmental DNA is not the tool by itself.

562 *Journal of Fish Biology*, jfb.14177. doi:10.1111/jfb.14177

563 Langlois, V. S., Allison, M. J., Bergman, L. C., To, T. A., & Helbing, C. C. (2020). The need for

564 robust qPCR-based eDNA detection assays in environmental monitoring and species

565 inventories. *Environmental DNA*, edn3.164. doi:10.1002/edn3.164

566 Larson, E. R., Renshaw, M. A., Gantz, C. A., Umek, J., Chandra, S., Lodge, D. M., & Egan, S.

567 P. (2017). Environmental DNA (eDNA) detects the invasive crayfishes *Orconectes rusticus*

568 and *Pacifastacus leniusculus* in large lakes of North America. *Hydrobiologia*, 800(1), 173–

569 185. doi:10.1007/s10750-017-3210-7

570 Lawson Handley, L., Read, D. S., Winfield, I. J., Kimbell, H., Johnson, H., Li, J., ... Hänfling, B.

571 (2019). Temporal and spatial variation in distribution of fish environmental DNA in

572 England's largest lake. *Environmental DNA*, 1(1), 26–39. doi:10.1002/edn3.5

573 Leese, F., Altermatt, F., Bouchez, A., Ekrem, T., Hering, D., Meissner, K., ... Zimmermann, J.

574 (2016). DNAqua-Net: Developing new genetic tools for bioassessment and monitoring of

575 aquatic ecosystems in Europe. *Research Ideas and Outcomes*, 2, e11321.

576 doi:10.3897/rio.2.e11321

577 MacDonald, A. J., & Sarre, S. D. (2017). A framework for developing and validating taxon-

578 specific primers for specimen identification from environmental DNA. *Molecular Ecology*

579 *Resources*, 17(4), 708–720. doi:10.1111/1755-0998.12618

580 MacKenzie, D. I., Nichols, J. D., Lachman, G. B., Droege, S., Royle, A., & Langtimm, C. A.

581 (2002). Estimating site occupancy rates when detection probabilities are less than one.

582 *Ecology*, 83(8), 2248–2255.



- 583 Mauvisseau, Q., Coignet, A., Delaunay, C., Pinet, F., Bouchon, D., & Souty-Grosset, C. (2018).  
584 Environmental DNA as an efficient tool for detecting invasive crayfishes in freshwater  
585 ponds. *Hydrobiologia*, *805*(1), 163–175. doi:10.1007/s10750-017-3288-y
- 586 Meusnier, I., Singer, G. A. C., Landry, J. F., Hickey, D. A., Hebert, P. D. N., & Hajibabaei, M.  
587 (2008). A universal DNA mini-barcode for biodiversity analysis. *BMC Genomics*, *9*.  
588 doi:10.1186/1471-2164-9-214
- 589 Natural England. (2015). Great crested newts: protection and licences. Retrieved 7 April 2020,  
590 from <https://www.gov.uk/guidance/great-crested-newts-protection-surveys-and-licences>
- 591 Nicholson, A., Mclsaac, D., MacDonald, C., Gec, P., Mason, B. E., Rein, W., ... Hanner, R. H.  
592 (2020). An analysis of metadata reporting in freshwater environmental DNA research calls  
593 for the development of best practice guidelines. *Environmental DNA*. doi:10.1002/edn3.81
- 594 R Core Team. (2020). R: A Language and Environment for Statistical Computing. Vienna,  
595 Austria: R Foundation for Statistical Computing. Retrieved from <https://www.r-project.org/>
- 596 Rees, H. C., Bishop, K., Middleditch, D. J., Patmore, J. R. M., Maddison, B. C., & Gough, K. C.  
597 (2014). The application of eDNA for monitoring of the Great Crested Newt in the UK.  
598 *Ecology and Evolution*, *4*(21), 4023–4032. doi:10.1002/ece3.1272
- 599 Rees, H. C., Maddison, B. C., Middleditch, D. J., Patmore, J. R. M., & Gough, K. C. (2014). The  
600 detection of aquatic animal species using environmental DNA - a review of eDNA as a  
601 survey tool in ecology. *Journal of Applied Ecology*, *51*(5), 1450–1459. doi:10.1111/1365-  
602 2664.12306
- 603 Robinson, C. V., Uren Webster, T. M., Cable, J., James, J., & Consuegra, S. (2018).  
604 Simultaneous detection of invasive signal crayfish, endangered white-clawed crayfish and  
605 the crayfish plague pathogen using environmental DNA. *Biological Conservation*, *222*,  
606 241–252. doi:10.1016/j.biocon.2018.04.009
- 607 Sepulveda, A. J., Nelson, N. M., Jerde, C. L., & Luikart, G. (2020). Are Environmental DNA  
608 Methods Ready for Aquatic Invasive Species Management? *Trends in Ecology &*

- 609 *Evolution*, 0(0). doi:10.1016/j.tree.2020.03.011
- 610 So, K. Y. K., Fong, J. J., Lam, I. P. Y., & Dudgeon, D. (2020). Pitfalls during in silico prediction  
611 of primer specificity for eDNA surveillance. *Ecosphere*, 11(7). doi:10.1002/ecs2.3193
- 612 Thalinger, B., Oehm, J., Mayr, H., Obwexer, A., Zeisler, C., & Traugott, M. (2016). Molecular  
613 prey identification in Central European piscivores. *Molecular Ecology Resources*, 16(1),  
614 123–137. doi:10.1111/1755-0998.12436
- 615 Thalinger, B., Wolf, E., Traugott, M., & Wanzenböck, J. (2019). Monitoring spawning migrations  
616 of potamodromous fish species via eDNA. *Scientific Reports*, 9(1). doi:10.1038/s41598-  
617 019-51398-0
- 618 Thomsen, P. F., Kielgast, J., Iversen, L. L., Wiuf, C., Rasmussen, M., Gilbert, M. T. P., ...  
619 Willerslev, E. (2012). Monitoring endangered freshwater biodiversity using environmental  
620 DNA. *Molecular Ecology*, 21(11), 2565–2573. doi:10.1111/j.1365-294X.2011.05418.x
- 621 Tsuji, S., Takahara, T., Doi, H., Shibata, N., & Yamanaka, H. (2019). The detection of aquatic  
622 macroorganisms using environmental DNA analysis—A review of methods for collection,  
623 extraction, and detection. *Environmental DNA*, 1(2), 99–108. doi:10.1002/edn3.21
- 624 Veldhoen, N., Hobbs, J., Ikonomou, G., Hii, M., Lesperance, M., & Helbing, C. C. (2016).  
625 Implementation of novel design features for qPCR-based eDNA assessment. *PLoS ONE*,  
626 11(11), 1–23. doi:10.1371/journal.pone.0164907
- 627 Wang, S., Yan, Z., Hänfling, B., Zheng, X., Wang, P., Fan, J., & Li, J. (2021, February 10).  
628 Methodology of fish eDNA and its applications in ecology and environment. *Science of the*  
629 *Total Environment*. Elsevier B.V. doi:10.1016/j.scitotenv.2020.142622
- 630 Wilcox, T. M., Carim, K. J., McKelvey, K. S., Young, M. K., & Schwartz, M. K. (2015). The dual  
631 challenges of generality and specificity when developing environmental DNA markers for  
632 species and subspecies of *Oncorhynchus*. *PLOS ONE*, 10(11), e0142008.  
633 doi:10.1371/journal.pone.0142008
- 634 Wilcox, T. M., Young, M. K., McKelvey, K. S., Isaak, D. J., Horan, D. L., & Schwartz, M. K.

635 (2018). Fine-scale environmental DNA sampling reveals climate-mediated interactions  
636 between native and invasive trout species. *Ecosphere*, 9(11), e02500.  
637 doi:10.1002/ecs2.2500

638 Williams, M. A., O'Grady, J., Ball, B., Carlsson, J., de Eyto, E., McGinnity, P., ... Parle-  
639 McDermott, A. (2019). The application of CRISPR-Cas for single species identification from  
640 environmental DNA. *Molecular Ecology Resources*, 19(5), 1106–1114. doi:10.1111/1755-  
641 0998.13045

642 Williams, M. R., Stedtfeld, R. D., Engle, C., Salach, P., Fakher, U., Stedtfeld, T., ... Hashsham,  
643 S. A. (2017). Isothermal amplification of environmental DNA (eDNA) for direct field-based  
644 monitoring and laboratory confirmation of *Dreissena* sp. *PLOS ONE*, 12(10).  
645 doi:10.1371/journal.pone.0186462

646 World Health Organization. (2011). *Laboratory quality standards and their implementation*. New  
647 Delhi: WHO Regional Office for the Western Pacific.

648 Yamanaka, H., & Minamoto, T. (2016). The use of environmental DNA of fishes as an efficient  
649 method of determining habitat connectivity. *Ecological Indicators*, 62, 147–153.  
650 doi:10.1016/j.ecolind.2015.11.022

651 Ye, J., Coulouris, G., Zaretskaya, I., Cutcutache, I., Rozen, S., & Madden, T. L. (2012). Primer-  
652 BLAST: a tool to design target-specific primers for polymerase chain reaction. *BMC*  
653 *Bioinformatics*, 13, 134. doi:10.1186/1471-2105-13-134  
654

655 **Tables and Figures**

656 **Table 1:** A guideline for troubleshooting at different stages of the validation process.

| General issues                                        | <i>In silico</i> validation                                                                                   | <i>In vitro</i> validation                                                                                                                          | <i>In situ</i> validation                                                                                                                                                                        |                                                                                                                                                                             |                                                                                              |
|-------------------------------------------------------|---------------------------------------------------------------------------------------------------------------|-----------------------------------------------------------------------------------------------------------------------------------------------------|--------------------------------------------------------------------------------------------------------------------------------------------------------------------------------------------------|-----------------------------------------------------------------------------------------------------------------------------------------------------------------------------|----------------------------------------------------------------------------------------------|
| <b>Applying assay to a new geographic location</b>    | Test non-target sequences available on public/custom databases from this location                             | Test tissue from non-target species present at this location, including species present at original location if populations are genetically diverse | Test assay at sites where new, potentially problematic non-target species are known to occur                                                                                                     |                                                                                                                                                                             |                                                                                              |
| <b>Sparse reference data</b>                          | Where possible, Sanger sequence tissue DNA from target and non-target species to generate reference sequences | Extensively test assay on tissue available for target and non-target species, i.e. test extracts from multiple individuals                          | Extensively test assay at sites where target species co-occurs with non-target species lacking reference sequences, and at sites where only non-target species lacking reference sequences occur |                                                                                                                                                                             |                                                                                              |
| <i>In vitro</i> validation issues                     |                                                                                                               | <i>In situ</i> validation issues                                                                                                                    |                                                                                                                                                                                                  |                                                                                                                                                                             |                                                                                              |
|                                                       | Troubleshooting guidelines                                                                                    |                                                                                                                                                     | Troubleshooting guidelines                                                                                                                                                                       |                                                                                                                                                                             |                                                                                              |
| <b>Poor amplification efficiency</b>                  | Optimise reaction volume                                                                                      | <b>Expected species presence/absence not confirmed</b>                                                                                              | Survey sites with conventional tools and eDNA metabarcoding if possible                                                                                                                          |                                                                                                                                                                             |                                                                                              |
|                                                       | Optimise cycle number                                                                                         |                                                                                                                                                     | <b>False positives</b>                                                                                                                                                                           | Discard samples corresponding to contaminated controls; consider lack of specificity; Sanger sequence results                                                               |                                                                                              |
|                                                       | Optimise primer-probe concentration                                                                           |                                                                                                                                                     |                                                                                                                                                                                                  | Resample with more stringent decontamination measures in place                                                                                                              |                                                                                              |
|                                                       | Optimise annealing temperature using gradient PCR                                                             |                                                                                                                                                     |                                                                                                                                                                                                  | <b>False negatives</b>                                                                                                                                                      | Check for inhibition and treat samples if inhibited; consider timing and spacing of sampling |
|                                                       | Optimise technical replication                                                                                |                                                                                                                                                     |                                                                                                                                                                                                  |                                                                                                                                                                             | Increase technical replication                                                               |
| Check pipetting accuracy                              | Resample and increase biological replication and volume of water collected                                    |                                                                                                                                                     |                                                                                                                                                                                                  |                                                                                                                                                                             |                                                                                              |
| <b>Poor specificity</b>                               | Increase annealing temperature                                                                                | <b>Poor quality Sanger sequencing</b>                                                                                                               | Purify amplicons prior to sequencing                                                                                                                                                             |                                                                                                                                                                             |                                                                                              |
|                                                       | Add hydrolysis probe                                                                                          |                                                                                                                                                     | Concentrate amplicons prior to sequencing                                                                                                                                                        |                                                                                                                                                                             |                                                                                              |
|                                                       | Perform melting curve analysis                                                                                |                                                                                                                                                     | <b>Inhibition (determined by failed/skewed amplification of IPC or non-target assay)</b>                                                                                                         | Use a DNA extraction kit that includes an inhibitor removal step (e.g. mu-DNA, Qiagen QIAamp DNA Stool Mini Kit, Qiagen DNeasy PowerWater Kit, Qiagen DNeasy PowerSoil Kit) |                                                                                              |
|                                                       | Try other enzymes (e.g. EMM)                                                                                  |                                                                                                                                                     |                                                                                                                                                                                                  | Apply an inhibitor removal kit (e.g. OneStep Inhibitor Removal Kit, Zymo Research Corp.) to samples                                                                         |                                                                                              |
| Consider redesign                                     | Use PCR reagents designed to handle inhibition (e.g. TaqMan Environmental Master Mix, Bovine Serum Albumin)   |                                                                                                                                                     |                                                                                                                                                                                                  |                                                                                                                                                                             |                                                                                              |
| <b>Low sensitivity (see also Klymus et al., 2019)</b> | Ensure enough replication of fresh standards used when establishing the Limit of Detection                    |                                                                                                                                                     |                                                                                                                                                                                                  |                                                                                                                                                                             |                                                                                              |
|                                                       | Use TE buffer and tRNA to make standard dilutions, not molecular grade water                                  |                                                                                                                                                     |                                                                                                                                                                                                  |                                                                                                                                                                             |                                                                                              |
|                                                       | Use low retention tubes and pipette tips when preparing standards to prevent adsorption to plastic            |                                                                                                                                                     |                                                                                                                                                                                                  |                                                                                                                                                                             |                                                                                              |
|                                                       | If possible, switch to PCR platform with greater sensitivity                                                  |                                                                                                                                                     |                                                                                                                                                                                                  |                                                                                                                                                                             |                                                                                              |
|                                                       | Consider redesign                                                                                             |                                                                                                                                                     |                                                                                                                                                                                                  |                                                                                                                                                                             |                                                                                              |

657 **Table 2:** Detection methods and their trade-offs used for targeted eDNA assays. Abbreviations  
 658 are as follows: polymerase chain reaction (PCR), capillary electrophoresis (CE), quantitative (q),  
 659 digital (d), intercalating dye (ID), loop-mediated isothermal amplification (LAMP).

| Trade-offs                     | Endpoint PCR-gel                                                          | Endpoint PCR-CE                                             | qPCR-ID            | qPCR-probe                              | dPCR-ID                 | dPCR-probe                              | LAMP                                       |
|--------------------------------|---------------------------------------------------------------------------|-------------------------------------------------------------|--------------------|-----------------------------------------|-------------------------|-----------------------------------------|--------------------------------------------|
| <b>Quantification</b>          | no                                                                        | yes<br>(limited precision)                                  | yes                | yes                                     | yes                     | yes                                     | yes, with real-time monitoring             |
| <b>LOD (sensitivity)</b>       | medium - high DNA concentration<br>(depending on which intercalating dye) | low - medium DNA concentration (with a well-designed assay) | low DNA quantities | low DNA quantities                      | absolute DNA quantities | absolute DNA quantities                 | medium DNA concentration                   |
| <b>Specificity</b>             | medium                                                                    | medium                                                      | medium             | high                                    | medium                  | high                                    | high                                       |
| <b>Cost reagents</b>           | low                                                                       | medium                                                      | high               | high                                    | high                    | very high                               | medium                                     |
| <b>Cost equipment</b>          | low                                                                       | medium                                                      | medium             | medium                                  | high                    | high                                    | low - medium<br>(depending on LAMP cycler) |
| <b>Multiplex possible</b>      | yes, if different sizes are used                                          | yes, if different sizes or fluorophores are used            | difficult          | yes, if different fluorophores are used | difficult               | yes, if different fluorophores are used | yes                                        |
| <b>Time (PCR to data)</b>      | slow                                                                      | slow                                                        | medium             | medium                                  | slow                    | slow                                    | fast (15-30 min)                           |
| <b>Assay type transferable</b> | yes                                                                       | yes                                                         | yes                | yes                                     | yes, to qPCR            | yes, to qPCR                            | not easily                                 |
| <b>Effort to design assay</b>  | low - medium                                                              | low - medium                                                | high               | high                                    | high                    | high                                    | high                                       |
| <b>Specialised software</b>    | advisable                                                                 | advisable                                                   | advisable          | required                                | advisable               | required                                | required                                   |
| <b>Sequencing confirmation</b> | yes                                                                       | yes                                                         | yes                | yes                                     | limited                 | limited                                 | limited                                    |

660 **Table 3:** The thematic variable blocks of the 5-level validation scale and their respective  
 661 minimum criteria.

| Validation level | Variable blocks                                                                   | Minimum criteria                                                       |
|------------------|-----------------------------------------------------------------------------------|------------------------------------------------------------------------|
| Level 1          | <i>in silico</i> analysis                                                         | target species                                                         |
|                  | target tissue testing                                                             | target tissue                                                          |
|                  | target tissue PCR                                                                 | primer (and probe) sequence                                            |
| Level 2          | comprehensive reporting of PCR conditions                                         | DNA extract volume in PCR                                              |
|                  | <i>in vitro</i> testing on closely related non-target species                     | any <i>in vitro</i> non-target testing                                 |
| Level 3          | extraction method performed on eDNA samples                                       | method of extraction                                                   |
|                  | concentration of eDNA from environmental sample                                   | filter type or precipitation chemicals                                 |
|                  | detection obtained from environmental samples                                     | detection from an environmental sample (artificial or natural habitat) |
| Level 4          | Limit of Detection (LOD)                                                          | LOD determined                                                         |
|                  | extensive field testing of environmental samples                                  | multiple locations or multiple samples                                 |
|                  | <i>in vitro</i> testing on co-occurring non-target species                        | any advanced <i>in vitro</i> testing                                   |
| Level 5          | comprehensive specificity testing                                                 | non-co-occurring/closely related species checked from <i>in silico</i> |
|                  | detection probability estimation from statistical modelling                       | any effort made towards detection probability estimation               |
|                  | understanding ecological and physical factors influencing eDNA in the environment | any factor influencing eDNA in the environment tested                  |

662 **Figure 1:** An overview of the 5-level validation scale. For each of the levels (incomplete to  
663 operational), the main accomplishments in the validation process and an appropriate  
664 interpretation of results are provided.

665  
666 **Figure 2:** The main outcomes of the meta-analysis based on 546 assays from 327 publications  
667 are presented in panels A to E. Assay classification is based on the minimum criteria presented  
668 in Figure 1. Level 0 codes for assays that did not reach Level 1 on the validation scale. The  
669 colour coding is consistent for all panels: Level 0 (grey), Level 1 (dark purple), Level 2 (blue),  
670 Level 3 (turquoise), Level 4 (green), and Level 5 (yellow). Panel A shows the distribution of  
671 assays across levels of the validation scale. Panel B displays the percentage of assays ( $N =$   
672 546) rated Level 0 to 4 that have been published each year since 2003. Panel C summarises  
673 variable reporting per assay level. Panel D shows the percentage of assays reporting a specific  
674 variable (colour-coded according to level). Panel E shows the minimum criteria necessary to  
675 reach each level of the validation scale, and the percentage of Level 0 to 4 assays that did not  
676 report these. All variable abbreviations are listed in SI1.

677  
678 **Figure 3:** Classification tree analysis identifying the criteria distinguishing assays at different  
679 levels of the validation scale. The conditions along the branches show the criteria on which the  
680 dataset is split. Numbers in coloured leaves show the validation level of the assays in the  
681 respective leaf. Numbers below the leaves represent the number of assays per validation level,  
682 summarised inside an individual leaf. The displayed percentage is the proportion of assays  
683 summarised per leaf.

684  
685 **Box 1:** Examples of assays rated at Levels 0 to 4. The vertical tile plot shows which of the  
686 minimum criteria the assay fulfils (yellow tiles), and the bar chart gives the scoring percentage  
687 (i.e. the proportion of variables that were tested or reported) for each of the variable blocks.

688 Bars are coloured according to the score obtained from a block with dark purple coding for “no  
689 validation” and yellow coding for “comprehensive validation”.  
690



Figure 1

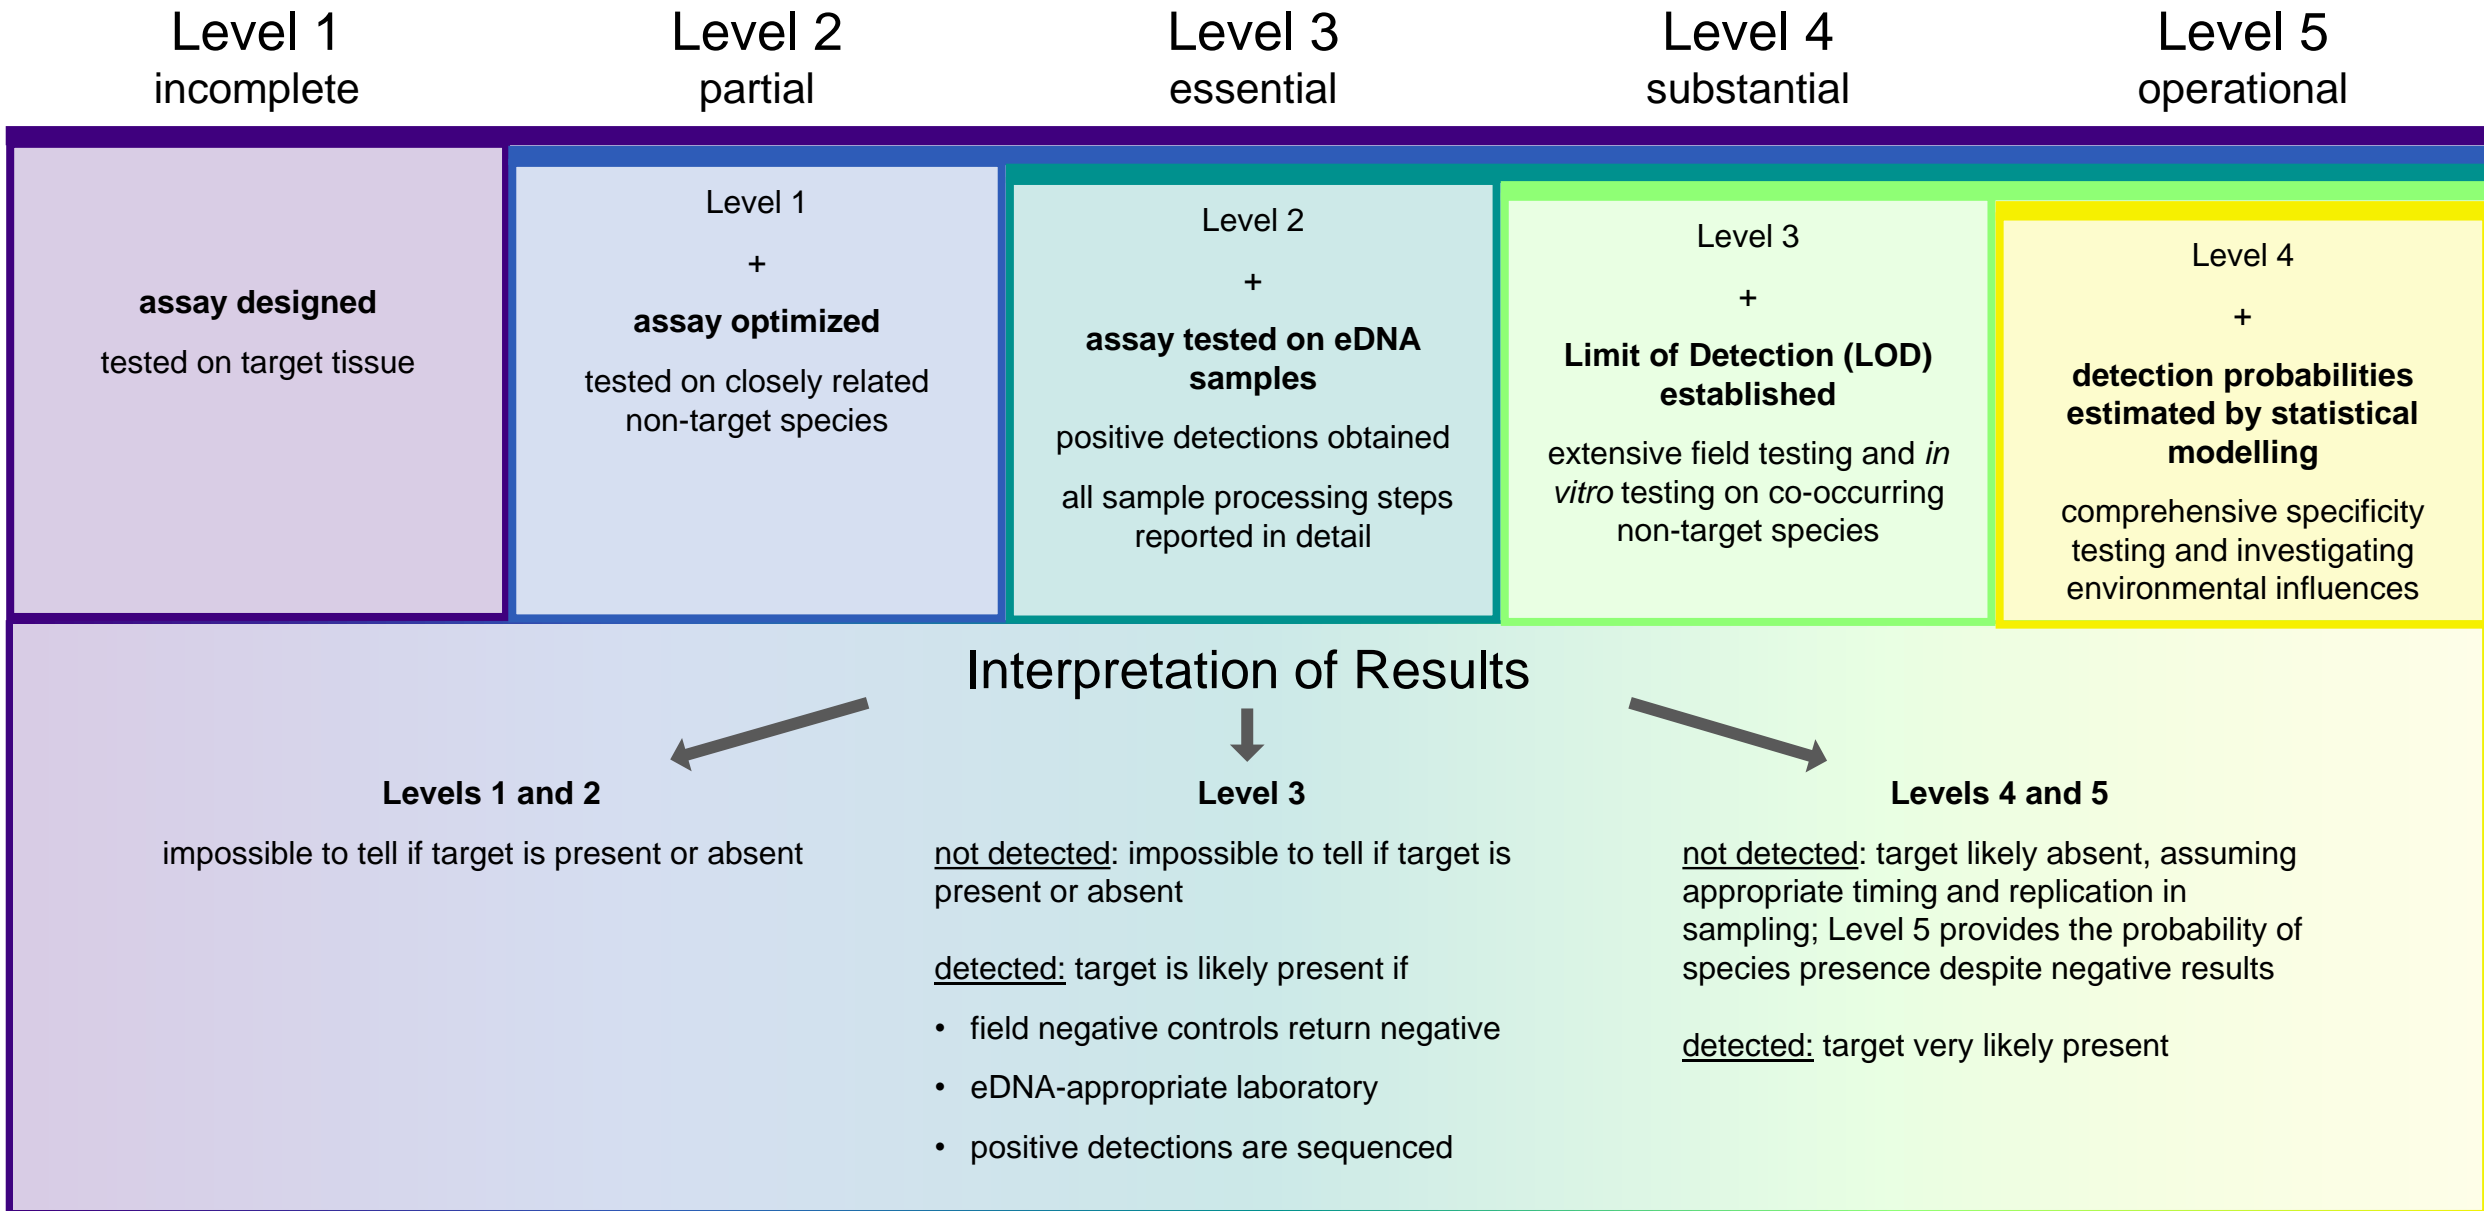

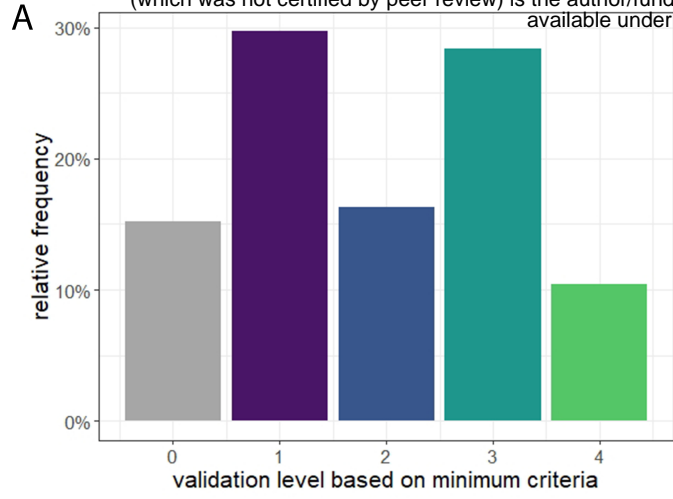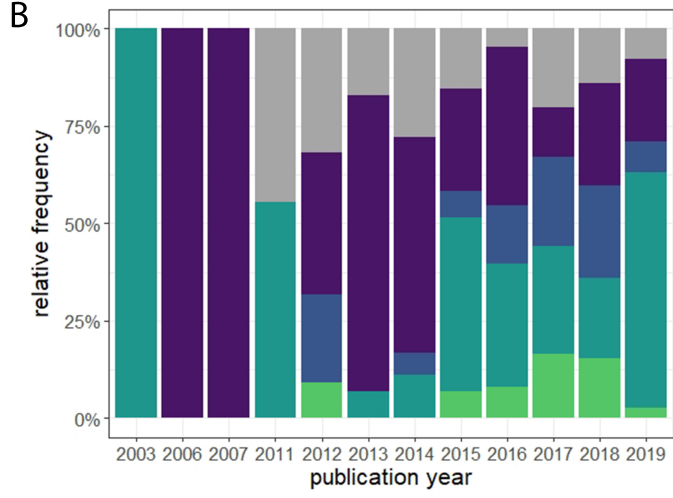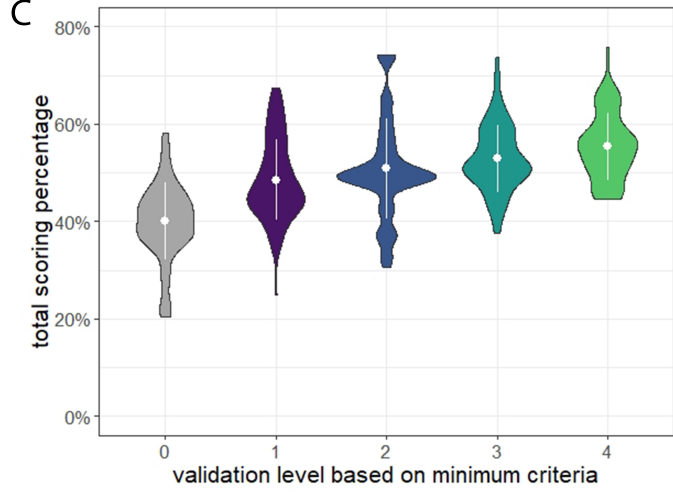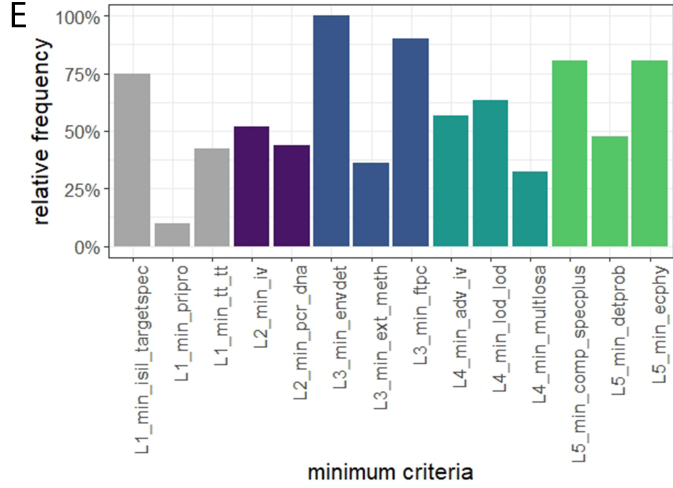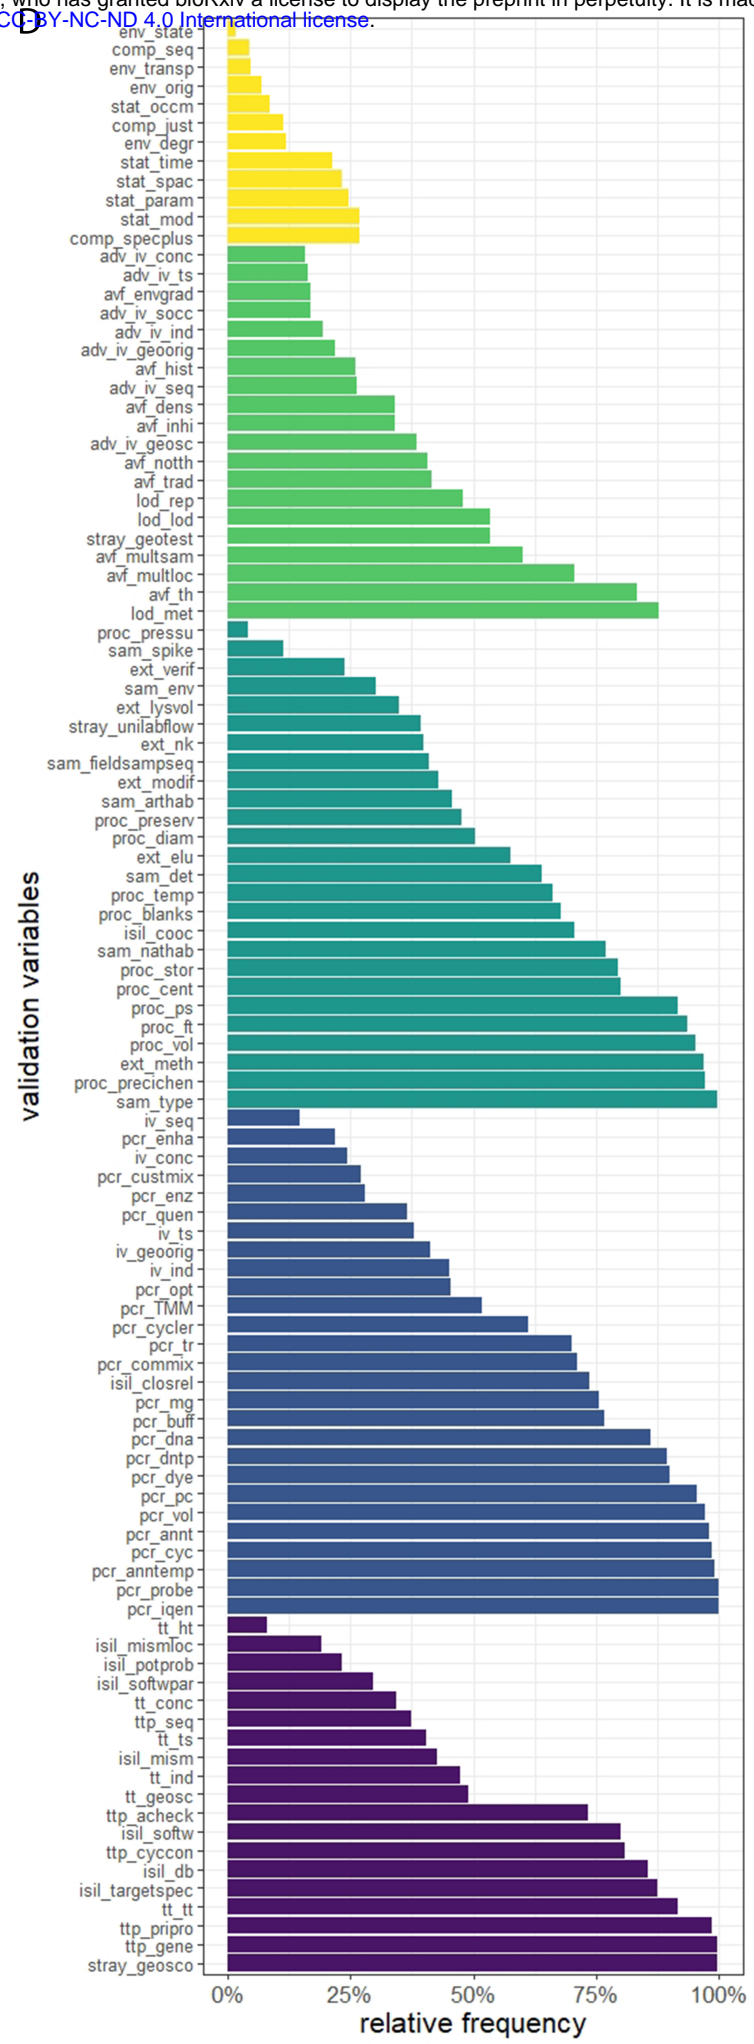

Figure 3:

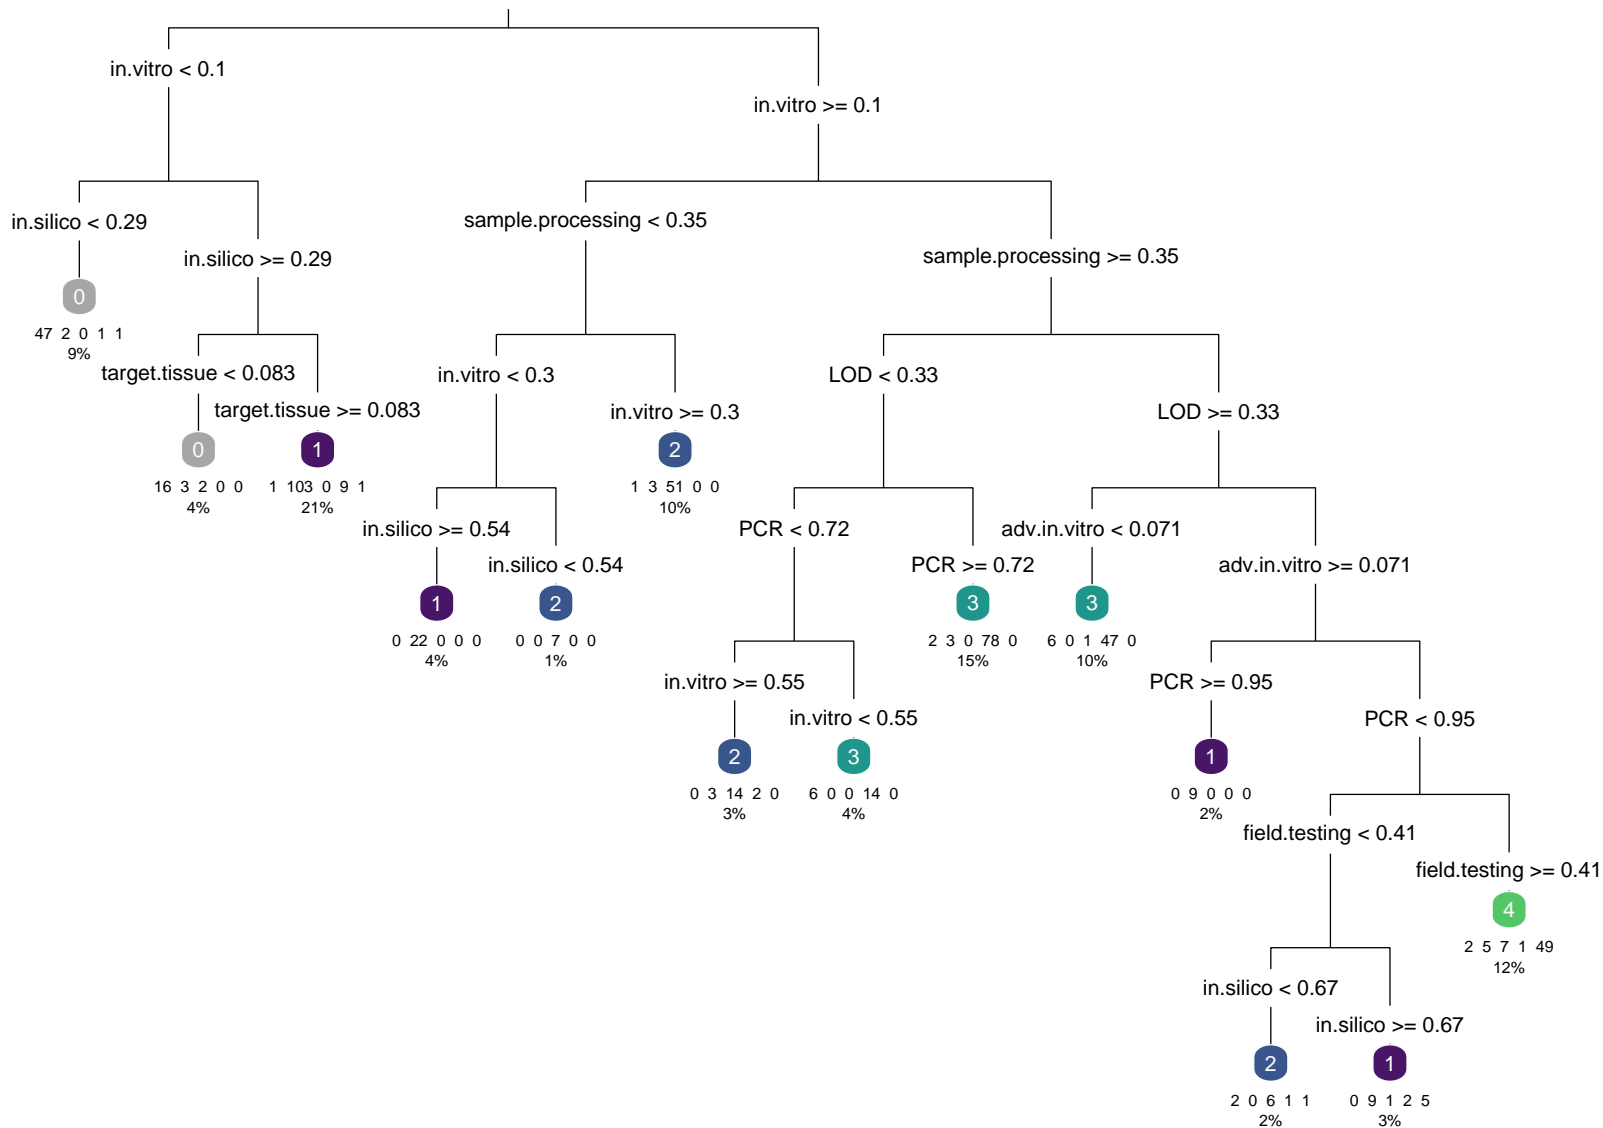

## Box 1:

**Level 4:** Assay no. 165 detecting brook trout, *Salvelinus fontinalis*. Assay information was published in paper nos. 291, 12, 145, 295, 144, with latest publication in 2018. Despite low validation efforts for *in vitro* testing and field detection, the only minimum criterion that prevented this assay attaining Level 5 was “comprehensive specificity testing”.

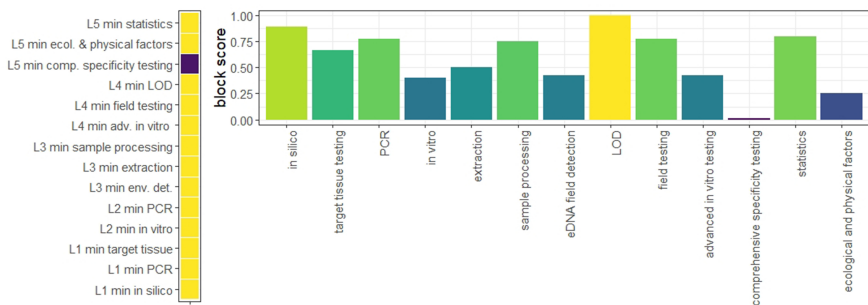

**Level 3:** Assay no. 473 detecting the crucian carp, *Carassius carassius*. Assay information was published in paper no. 119 in 2019. No advanced *in vitro* testing was conducted for this assay, but validation efforts were substantial for most thematic blocks, especially “*in silico* testing”, “LOD determination”, and “comprehensive specificity testing”.

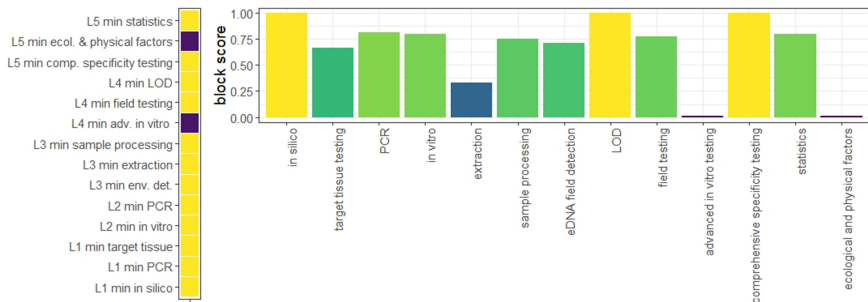

**Level 2:** Assay no. 270 detecting common eelgrass, *Zostera marina*. Assay information was published in paper no. 117 in 2018. Despite low validation efforts in many thematic blocks, only the minimum criterion of “sample processing” prevented this assay from reaching Level 4 on the validation scale

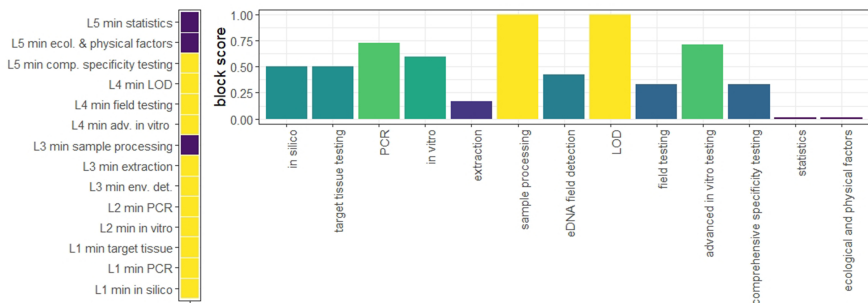

**Level 1:** Assay no. 315 detecting the waterlouse, *Asellus aquaticus*. Assay information was published in paper no. 163 in 2015. With additional *in vitro* testing, this assay would have attained Level 3. A clear decrease in validation efforts is visible for variable blocks associated with higher levels of the validation scale.

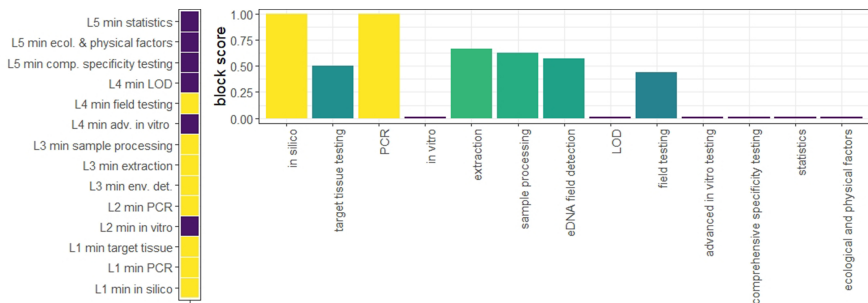

**Level 0:** Assay no. 343 detecting *Daphnia magna*. Assay information was published in paper no. 243 in 2018. Despite some advanced validation, this assay does not fulfill the minimum criterion of “*in silico* testing” and “target tissue testing”. Therefore, it could not be classed as Level 1 on the validation scale.

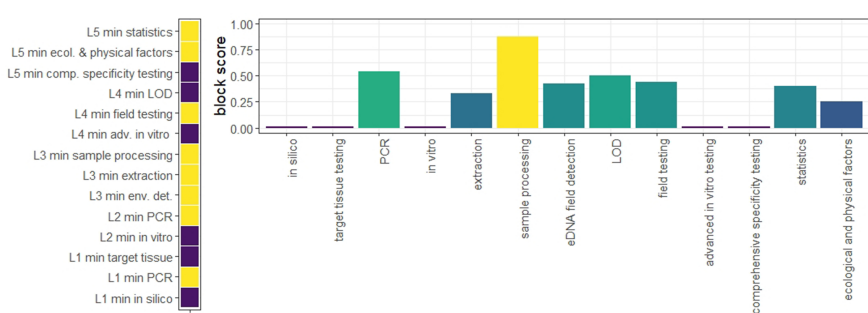

Source: https://www.biorxiv.org/content/10.1101/2020.04.27.063990v4.full.pdf
