# Supplementary material for: A validation scale to determine the readiness of environmental DNA assays for routine species monitoring
Source: bioRxiv or medRxiv preprint supplement (doi:10.1101/2020.04.27.063990), 2021-02-03
Supplement: Supplementary file [file media-2.pdf]

## 1 Supporting Information 2

### 2 2A) Compilation of the Literature Database

3 We compiled a literature database of published single-species eDNA assays, excluding work  
4 on microbial eDNA, metabarcoding and dietary studies. First, every paper listed on the  
5 “Environmental DNA: Tools and Resources” homepage of Washington State University  
6 (<https://labs.wsu.edu/edna/edna-assays>) as of 10 April 2019 was checked for suitability and  
7 added to the literature database. Afterwards, a literature search on Web of Science  
8 (<http://apps.webofknowledge.com/>) was conducted on 11 April 2019 using the following search  
9 criteria:

10 TS=("environmental DNA" OR "eDNA") NOT TS=("biofilm" OR "biofilms" OR "microbial" OR  
11 "bacterial" OR "microorganism" OR "microorganisms" OR "metabarcoding" OR  
12 "metagenomics" OR "next generation sequencing"); Databases= WOS, KJD, MEDLINE, RSCI,  
13 SCIELO; Timespan=2008-2019; Search language=English; Research Domain: science and  
14 technology; Document type: article, correction, book.

15 A list of 660 Web of Science entries was returned. Each of the publications was manually  
16 checked for suitability based on the exclusion criteria above, resulting in a set of 319 papers.  
17 During the assay validation process, it was necessary to include additional papers that  
18 originally published a primer set or that contained other information vital to the assay validation  
19 process. The final literature database contained 327 papers  
20 (<https://doi.org/10.6084/m9.figshare.12184860.v1>).

21

### 22 2B) R packages used for analysis

23 The following R packages were used for data analysis: “ggplot2” (Wickham, 2016),  
24 “RColorBrewer”(Neuwirth, 2014), “scales” (Wickham & Seidel, 2019), “viridis” (Garnier, 2018),  
25 “rpart” (Therneau & Atkinson, 2019), “rpart.plot” (Milborrow, 2019), and “gridExtra” (Auguie,  
26 2017), “dplyr” (Wickham, François, Henry, & Müller, 2019) and “hrbrthemes” (Rudis, 2019).

27

28

29 **References**

- 30 Auguie, B. (2017). gridExtra: Miscellaneous Functions for 'Grid' Graphics. Retrieved from  
31 <https://cran.r-project.org/package=gridExtra>
- 32 Garnier, S. (2018). viridis: Default Color Maps from 'matplotlib'. Retrieved from [https://cran.r-](https://cran.r-project.org/package=viridis)  
33 [project.org/package=viridis](https://cran.r-project.org/package=viridis)
- 34 Milborrow, S. (2019). rpart.plot: Plot 'rpart' Models: An Enhanced Version of 'plot.rpart'.  
35 Retrieved from <https://cran.r-project.org/package=rpart.plot>
- 36 Neuwirth, E. (2014). RColorBrewer: ColorBrewer Palettes. Retrieved from [https://cran.r-](https://cran.r-project.org/package=RColorBrewer)  
37 [project.org/package=RColorBrewer](https://cran.r-project.org/package=RColorBrewer)
- 38 Rudis, B. (2019). hrbrthemes: Additional Themes, Theme Components and Utilities for  
39 'ggplot2'. Retrieved from <https://cran.r-project.org/package=hrbrthemes>
- 40 Therneau, T., & Atkinson, B. (2019). rpart: Recursive Partitioning and Regression Trees.  
41 Retrieved from <https://cran.r-project.org/package=rpart>
- 42 Wickham, H. (2016). *ggplot2: Elegant Graphics for Data Analysis*. Springer-Verlag New York.  
43 Retrieved from <https://ggplot2.tidyverse.org>
- 44 Wickham, H., François, R., Henry, L., & Müller, K. (2019). dplyr: A Grammar of Data  
45 Manipulation. Retrieved from <https://cran.r-project.org/package=dplyr>
- 46 Wickham, H., & Seidel, D. (2019). scales: Scale Functions for Visualization. Retrieved from  
47 <https://cran.r-project.org/package=scales>

48
