# Supplementary material for: A validation scale to determine the readiness of environmental DNA assays for routine species monitoring
Source: bioRxiv or medRxiv preprint supplement (doi:10.1101/2020.04.27.063990), 2021-02-03
Supplement: Supplementary file [file media-5.pdf]

# 1 Supporting Information 5

## 2 Classification Tree Analysis

3

4 Using the five levels of the validation scale as a response variable, a classification tree analysis  
5 was carried out (De’Ath & Fabricius, 2000). As the individual use of the 104 binary variables  
6 comprising the validation scale led to hardly comprehensible results (data not shown), scores of  
7 the checklist variables entered the analysis in a condensed form. For each of the 14 thematic  
8 variable blocks, an individual scoring percentage was calculated per assay: the sum of positive  
9 scores (yes/tested/reported) in a block was divided by the total number of applicable variables in  
10 the respective block. Hence, 14 block scoring percentages, i.e. values between 0 and 1, were  
11 generated for each of the 546 assays (<https://doi.org/10.6084/m9.figshare.12184860.v1>). These  
12 14 block scoring percentages for each assay were used as explanatory variables for calculating  
13 a classification tree using R (R Core Team, 2019) and the packages “rpart” (Therneau & Atkinson,  
14 2019) and “rpart.plot” (Milborrow, 2019).

15

16

### 17 **References**

18 De’Ath, G., & Fabricius, K. E. (2000). Classification and regression trees: A powerful yet simple  
19 technique for ecological data analysis. *Ecology*, *81*(11), 3178–3192. doi:10.1890/0012-  
20 9658(2000)081[3178:CARTAP]2.0.CO;2

21 Milborrow, S. (2019). rpart.plot: Plot ‘rpart’ Models: An Enhanced Version of ‘plot.rpart’. Retrieved  
22 from <https://cran.r-project.org/package=rpart.plot>

23 R Core Team. (2019). R: A Language and Environment for Statistical Computing. Vienna, Austria:  
24 R Foundation for Statistical Computing. Retrieved from <https://www.r-project.org/>

25 Therneau, T., & Atkinson, B. (2019). rpart: Recursive Partitioning and Regression Trees.  
26 Retrieved from <https://cran.r-project.org/package=rpart>

27
